# 1 **Apical contacts stemming from incomplete** 2 **delamination guide progenitor cell allocation through a** 3 **dragging mechanism**

4  
5 Eduardo Pulgar,<sup>1,2</sup> Cornelia Schwayer,<sup>3</sup> Néstor Guerrero,<sup>1,2</sup> Loreto López,<sup>1,2</sup> Susana Márquez,<sup>4</sup>  
6 Steffen Härtel,<sup>1,2,5</sup> Rodrigo Soto,<sup>4</sup> Carl-Philipp Heisenberg,<sup>3</sup> and Miguel L. Concha<sup>1,2,6\*</sup>

7  
8 <sup>1</sup> Institute of Biomedical Sciences, Faculty of Medicine, Universidad de Chile, PO Box 70031, Santiago,  
9 Chile.

10 <sup>2</sup> Biomedical Neuroscience Institute, Independencia 1027, Santiago, Chile.

11 <sup>3</sup> Institute of Science and Technology Austria, Am Campus 1, A-3400, Klosterneuburg, Austria.

12 <sup>4</sup> Physics Department, FCFM, Universidad de Chile, Beauchef 850, Santiago, Chile.

13 <sup>5</sup> National Center for Health Information Systems, CENS, Santiago, Chile

14 <sup>6</sup> Center for Geroscience, Brain Health and Metabolism, Santiago, Chile

15

16 \*For correspondence: [mconcha@uchile.cl](mailto:mconcha@uchile.cl)

17 **Keywords:** cell delamination, apical constriction, dragging, mechanical forces, collective  
18 locomotion, dorsal forerunner cells, zebrafish.

19 **Impact Statement:** Incomplete delamination serves as a cellular platform for coordinated tissue  
20 movements during development, guiding newly formed progenitor cell groups to the differentiation  
21 site.

## 22 **Abstract**

23 The developmental strategies used by progenitor cells to endure a safe journey from their induction  
24 place towards the site of terminal differentiation are still poorly understood. Here we uncovered a  
25 progenitor cell allocation mechanism that stems from an incomplete process of epithelial  
26 delamination that allows progenitors to coordinate their movement with adjacent extra-embryonic  
27 tissues. Progenitors of the zebrafish laterality organ originate from the surface epithelial enveloping  
28 layer by an apical constriction process of cell delamination. During this process, progenitors retain  
29 long-term apical contacts that enable the epithelial layer to pull a subset of progenitors along their  
30 way towards the vegetal pole. The remaining delaminated progenitors follow apically-attached  
31 progenitors' movement by a co-attraction mechanism, avoiding sequestration by the adjacent  
32 endoderm, ensuring their fate and collective allocation at the differentiation site. Thus, we reveal that  
33 incomplete delamination serves as a cellular platform for coordinated tissue movements during  
34 development.

## 35 Introduction

36 During embryo development, naïve cell lineages undergo concurrent processes of fate specification  
37 and morphogenesis as critical steps towards the generation of differentiated tissues and organs.  
38 These early progenitor cells often ought to travel long distances from their induction site to the site  
39 of terminal differentiation, making them vulnerable to environmental signals and the movement of  
40 neighbouring tissues that may impede a correct path or change their potential, and consequently  
41 reduce the pool of progenitors available for subsequent stages of differentiation. The success of this  
42 journey is especially important when the number of progenitors of a tissue or organ is limited. In  
43 these cases, small reductions in the number of progenitors can lead to developmental abnormalities  
44 that result in a dysfunctional organ ([Moreno-Ayala, et al., 2020](#)). Various embryonic tissues and  
45 organs originate from small sets of progenitor cells, including the primordial germ cells that give rise  
46 to gametes in the gonads of vertebrates and invertebrates, the primordia of the posterior lateral line  
47 that give rise to neuromasts along the trunk and tail of fish and amphibians, and the progenitors of  
48 the laterality organ that participate in left-right pattern formation in several vertebrates ([reviewed in](#)  
49 [Dalle Nogare and Chitnis, 2017](#); [Reig, et al., 2014](#); [Matsui and Bessho, 2012](#); [Richardson and](#)  
50 [Lehmann, 2010](#)). Despite the importance of the developmental paths followed by these small groups  
51 of progenitor cells and their impact on the physiology of the organism we still know little about the  
52 array of developmental strategies progenitors cells deploy *in vivo* to overcome the challenges  
53 imposed by the environment while travelling to the site of terminal differentiation. Here we examine  
54 this question during the early stages of morphogenesis of the embryonic laterality organ, the first  
55 organ to be formed during vertebrate development, using zebrafish as a model organism.

56 The laterality organ or left-right organiser of zebrafish is a transient embryonic structure of epithelial  
57 nature known as the Kupffer's vesicle that contains motile cilia required for the determination of the  
58 left-right axis ([Essner, et al., 2005](#); [Kramer-Zucker, et al., 2005](#); [Cooper and D'Amico, 1996](#)). This  
59 organ-like epithelial structure originates from a small group of 20-30 progenitors, known as dorsal  
60 forerunner cells (DFCs), which arise at the dorsal margin of the late blastula by a process of cell  
61 ingression that converts the superficial epithelial cells of the extra-embryonic enveloping layer (EVL)  
62 into deep mesenchymal-type DFCs ([Oteiza, et al., 2008](#)). After ingression, DFCs move as a cellular  
63 collective from their place of origin at the equator of the embryo towards the vegetal pole, reaching  
64 the terminal location for organ differentiation at the posterior tip of the notochord ([Figure 1A](#);  
65 [Supplementary Video 1](#)) ([Oteiza, et al., 2008](#); [Cooper and D'Amico, 1996](#)). On their travel to the site  
66 of differentiation, DFCs are located ahead of the margin of the deep cell layer (DCL) where  
67 specification signals and massive internalisation movements transform the marginal epiblast into the

68 mesendoderm (Figure 1B) (Pinheiro and Heisenberg, 2020). Despite the proximity to the DCL  
69 margin and the fact that DFCs share critical determinants with the mesendoderm (Warga and Kane,  
70 2018; Alexander and Stainier, 1999), the movement and fate of DFCs do not seem to be affected by  
71 the specification signals nor by the *in mass* internalisation movements of the mesendoderm,  
72 remaining separated from this cellular domain during their vegetal movement. On the other hand,  
73 DFCs follow the same vegetal ward direction of movement as the overlying EVL during epiboly  
74 (Bruce and Heisenberg, 2020) and appear to be physically connected with this extra-embryonic  
75 epithelial tissue as revealed by the presence of puncta enriched in the TJ-associated zonula  
76 occludens 1 protein (ZO-1) at the DFC-EVL interface (Ablooglu, et al., 2010; Oteiza, et al., 2008).  
77 This observation raises the question of whether the presumed DFC-EVL connections play a role in  
78 the movement of DFCs towards the organ differentiation site, a hypothesis that has not yet been  
79 tested experimentally.

80 Here we addressed this hypothesis by combining *in vivo* imaging and biomechanical manipulation  
81 in zebrafish embryos. We found that DFCs arise from the EVL by an actomyosin-mediated apical  
82 constriction process of cell delamination. During this process, DFCs retain long-term physical  
83 connections with the EVL and yolk syncytial layer (YSL) through tight junction-enriched apical  
84 attachments, at the time both extra-embryonic tissues spread to the vegetal pole in the movement  
85 of epiboly. We demonstrated that extra-embryonic tissue spreading is transmitted to DFCs through  
86 the apical attachments to drag their vegetal movements. As DFCs detach from the extra-embryonic  
87 cellular domains after completing delamination or undergoing division, polarised protrusions and E-  
88 cadherin mediated adhesion integrate detached cells to the vegetal movement of attached DFCs,  
89 avoiding sequestration by the endoderm and ensuring the vegetal motion of all progenitors as a  
90 group. Thus, we unveil a drag-mediated guidance mechanism of progenitor cell morphogenesis that  
91 relies on the concerted activities of the process of epithelial delamination underlying progenitor cell  
92 specification and the directed spreading of adjacent extra-embryonic tissues.

93

94

## 95 Results

### 96 DFCs ingress by cell delamination through an apical constriction process that provides long- 97 term apical attachments with extra-embryonic tissues

98 The previous observation of puncta enriched in the tight junction adaptor protein ZO-1 at the interface  
99 between a subset of DFCs and the overlying EVL during late epiboly stages ([Ablooglu, et al., 2010](#);  
100 [Oteiza, et al., 2008](#)) suggests that DFCs establish contacts that attach them to the extra-embryonic  
101 surface epithelium. To investigate this possibility, we started by studying the spatial distribution of  
102 these enriched ZO-1 regions. Double immunolabelling for ZO-1 and phalloidin at 75% epiboly  
103 confirmed that ZO-1 puncta marked discrete regions, also enriched in F-actin, where DFCs  
104 contacted the EVL at cell-cell junctions near the margin of the epithelium ([Figure 1C, left](#)). Also, we  
105 observed the punctuated co-accumulation of ZO-1 and F-actin at the epithelial margin where DFCs  
106 contacted the YSL ([Figure 1C, right](#)). Indeed, the latter population of marginal DFCs was more  
107 abundant than submarginal DFCs ([Figures 1D and 1G](#)). We then asked how these contacts arise by  
108 examining the temporal progression of ZO-1 from early to late epiboly stages throughout DFC  
109 formation. Previous work have shown that DFC originate from dorsal EVL cells by a process of  
110 ingression ([Oteiza, et al., 2008](#)) although the underlying mechanism is currently unknown. We found  
111 that the punctuated ZO-1 and F-actin staining observed at late epiboly stages resulted from apical  
112 area reduction as DFCs underwent ingression from the EVL. At early epiboly stages, ZO-1  
113 accumulated along the apical junctions of DFC progenitors ([Figure 1D](#)). As epiboly progressed, the  
114 apical face of these cells gradually reduced in area to leave punctuated apical domains enriched in  
115 ZO-1 and F-actin proteins ([Figure 1D](#)). Together, these findings reveal that DFCs ingress from the  
116 EVL by a mechanism of cell delamination mediated by apical constriction. Remarkably, this process  
117 leaves discrete apical attachments with the extra-embryonic tissues.

118 To investigate the dynamics of apical constriction leading to the formation of apical attachments we  
119 performed *in vivo* imaging from late blastula to epiboly stages using a GFP-tagged version of ZO-1.  
120 We found that EVL cells fated to become DFCs gradually shrunk their apical area while moving  
121 beneath the epithelial sheet ([Figures 1E and 1F](#); [Supplementary Video 2](#)), a behaviour that was  
122 specific as neighbouring EVL cells not fated to become DFCs exhibited the opposite behaviour,  
123 increasing their apical area as epiboly progressed ([Figure 1H](#)). Interestingly, the kinetics of apical  
124 area reduction varied among DFCs ([Figure 1I](#)) and resulted in discrete apical attachments that  
125 connected these cells with the YSL and EVL for extended periods ([Figure 1F](#)). Collectively, these  
126 findings indicate that DFCs retain long-term apical attachments with the extra-embryonic YSL and

127 EVL as a consequence of the apical constriction process of cell delamination that gives rise to the  
128 cells.

### 129 **DFC apical constriction depends on actomyosin dynamics**

130 Contractile forces generated by an apical actomyosin network have been implicated in driving apical  
131 constriction in a variety of developmental processes (Heer and Martin, 2017). We thus assessed if  
132 actomyosin dynamics was responsible for DFC apical constriction by performing live imaging using  
133 a double fluorescent reporter line for non-muscular (NM) myosin II and F-actin. We found that apical  
134 constriction was accompanied by the medioapical accumulation of myosin II and F-actin at the apical  
135 face of DFCs (Figure 2A). Quantification of fluorescent intensities revealed that myosin II and F-actin  
136 accumulations increased as apical constriction progressed during DFC delamination (Figure 2B).  
137 The kinetics of medioapical actomyosin accumulation was asynchronous among DFCs (Figure 2B)  
138 reflecting the variation in the kinetics of apical area reduction previously observed within the DFC  
139 population (Figure 1I). Importantly, although the extent of medioapical myosin II and F-actin protein  
140 accumulation was variable among DFCs (Figure 2B) we found that it scaled with the reduction of  
141 DFC apical area (Figures 2C and 2D) suggesting that actomyosin contractility mediates DFC apical  
142 constriction. To investigate this possibility, we performed immunostaining for phospho-myosin II light  
143 chain, as phosphorylation of the myosin II light chain subunit regulates actomyosin contractility  
144 (Heissler and Sellers, 2016). We found that phospho-myosin II light chain was distributed in the  
145 apical face of DFCs during apical constriction confirming the contractile nature of the apical  
146 actomyosin network (Figures 2E and 2F). To confirm that actomyosin dynamics is required for apical  
147 constriction we studied the cases of DFCs showing a transitory increase of apical area while  
148 undergoing apical constriction. We observed a sequence of concatenated changes in apical area  
149 and myosin accumulation. First, apical constriction was concurrent with the accumulation of myosin  
150 at the apical face of DFCs (Figures 2G, 7 min, and 2H, yellow dotted line; Supplementary Video 3).  
151 Then, the loss of apical myosin was synchronous with the increase of DFC apical area (Figures 2G,  
152 18 min, and 2H, light blue dotted line; Supplementary Video 3). Finally, the recovery of apical myosin  
153 was followed by constriction of DFC apical area (Figures 2G, 24 min, and 2H; Supplementary Video  
154 3). Together, these findings indicate that a contractile medioapical actomyosin network regulates the  
155 apical constriction process that mediates DFC delamination.

### 156 **Cell delamination is concurrent with the vegetal movement of DFCs and extra-embryonic 157 tissues**

158 During epiboly, DFCs move from the embryo equator to the vegetal pole where they differentiate  
159 into the laterality organ (Oteiza, et al., 2008). Previous studies have hypothesised that the vegetal

160 movement of these cells relies on polarised protrusive activity (Zhang, et al., 2016; Ablooglu, et al.,  
161 2010). However, the presence of apical attachments connecting DFCs with the YSL and EVL opens  
162 the possibility that extra-embryonic tissues guide the vegetal movement of DFCs. To discriminate  
163 between these two guidance mechanisms, we first examined the organisation of polarised  
164 protrusions in DFCs. Using *in vivo* imaging in an actin transgenic reporter line we found that DFCs  
165 formed dynamic membrane protrusions (Supplementary Figure 1A), as previously observed (Zhang,  
166 et al., 2016; Ablooglu, et al., 2010). However, protrusions were enriched at the rear (lateral and  
167 animal) edges and not at the leading (vegetal) edge of the DFC cluster (Figures S1B-S1E) arguing  
168 against a primary role of polarised cell protrusions in directing the vegetal movement of DFCs.  
169 Therefore, DFC apical attachments could play a key role in guiding the vegetal movement of these  
170 cells. To experimentally address this hypothesis, we first determined the extent to which the vegetal  
171 movement of DFCs temporally matched the process of delamination using confocal microscopy  
172 (Figure 3A). We observed that DFCs travelled over 350  $\mu\text{m}$  towards the vegetal pole from the time  
173 in which the first DFCs started the process of apical constriction at around dome stage until the last  
174 cells delaminated after detachment from the extra-embryonic tissues after 90% epiboly (Figure 3B,  
175 horizontal axes). In agreement with the variable kinetics of apical constriction (Figure 1I) and  
176 actomyosin dynamics (Figure 2B), the onset of apical constriction and the time of detachment leading  
177 to delamination were also highly variable in the DFC population (Figures 3B, red and blue circles,  
178 and 3C). Together, the absence of vegetal ward polarised cell protrusions in DFCs, and the close  
179 concurrency of cell delamination with the vegetal movement of DFCs suggest that apical  
180 attachments with the YSL and EVL integrate DFCs to the epiboly movements of the extra-embryonic  
181 tissues. In support of this idea, the simultaneous tracking of DFCs and EVL cells revealed that the  
182 speed, direction and extent of DFC vegetal movement correlated with the vegetal spreading of the  
183 EVL (Figures S2A-S2C). Furthermore, DFCs and overlying EVL cells shared the same orientational  
184 bias in the axis of cell elongation (Supplementary Figure 2D) indicating a morphogenetic coupling  
185 between the two tissues. Collectively, these results suggest that apical attachments derived from the  
186 process of cell delamination work as tissue-tissue connectors that couple DFCs with the vegetal  
187 spreading of the extra-embryonic YSL and EVL, guiding their vegetal movement during epiboly.

### 188 **Extra-embryonic tissues pull DFCs through apical attachments to guide their vegetal** 189 **movement**

190 To directly test if apical attachments between DFCs and the extra-embryonic tissues guide the  
191 vegetal movement of DFCs we first disrupted the vegetal spreading of the YSL/EVL. Previous reports  
192 have shown that contraction and friction-based flows of a ring-like YSL actomyosin network drive

193 YSL/EVL vegetal spreading during epiboly (Heisenberg and Bellaiche, 2013; Behrndt, et al., 2012;  
194 Cheng, et al., 2004). Therefore, we inhibited the activity of the YSL actomyosin ring by decreasing  
195 the levels of phosphorylated myosin II through expressing, specifically in the YSL, the N-terminal  
196 region of the myosin phosphatase target subunit 1 (N-ter-MYPT1) (Figures S3A and S3B). Embryos  
197 expressing N-ter-MYPT1 (MYPT1) showed a speed drop in YSL/EVL vegetal spreading. Likewise,  
198 DFCs decreased their vegetal ward speed to the same extent (Figures S3C and S3D). Similarly,  
199 local disruption by laser ablation of the YSL actomyosin ring in direct contact with marginal DFCs  
200 decreased the speed of EVL spreading and DFC movement near the ablated zone (Figures S3E  
201 and S3F). Together, these results demonstrate that the progress of DFC vegetal movement requires  
202 the vegetal spreading of the extra-embryonic YSL/EVL.

203 Next, we conducted two types of experiments to assess if extra-embryonic tissue movement is  
204 transmitted to DFCs through their apical attachments. As a first experiment, we disrupted the animal-  
205 vegetal tension exerted by EVL spreading on the apical attachments through ablating a cortical EVL  
206 junction next to DFC apical attachments (Figure 4A). After ablation, apical attachments recoiled  
207 towards the animal pole triggering a fast retraction of DFCs in the same direction (Figures 4B and  
208 4C; Supplementary Video 4). Subsequently, the constricted cortical zone induced by wound repair  
209 pulled apical attachments towards the vegetal pole, restoring the vegetal directionality of DFC  
210 movement (Figures 4B and 4C; Supplementary Video 4). Finally, we analysed the few cases in which  
211 single DFCs developed in isolation far from the central cluster of DFCs. After tracking single isolated  
212 cells, we observed that DFCs devoid of apical attachments (hereafter referred to as “detached  
213 DFCs”) moved without persistence and directionality, even towards the animal pole in the opposite  
214 direction to the vegetal movement of the YSL/EVL (Figures 4D-4G; Supplementary Video 5). In  
215 contrast, DFCs connected with the extra-embryonic tissues by apical attachments (hereafter referred  
216 to as “attached DFCs”) showed a persistent and directed movement toward the vegetal pole,  
217 mimicking the movement of extra-embryonic tissues (Figures 4D-4G; Supplementary Video 5).  
218 Collectively, these findings demonstrate that apical attachments transmit the vegetal spreading of  
219 extra-embryonic tissues to attached DFCs guiding their vegetal movement during epiboly.

## 220 **DFCs sustain a collective vegetal movement despite the increase of detached cells**

221 The tracking of single isolated detached DFCs revealed that they failed to engage in directed and  
222 persistent vegetal movements (Figures 4D-4G; Supplementary Video 5). Importantly, this behaviour  
223 was also present in a subset of detached cells located close to or inside the central cluster of DFCs  
224 during epiboly. In about 70% of embryos, we found that one or two detached DFCs left the cell  
225 cluster moving mainly in direction to the animal pole being sequestered by the internalisation



226 movement of the DCL, incorporating into this embryonic cell layer (Figures 5A and 5B;  
227 Supplementary Video 6). Remarkably, this group of DFCs mimicked the morphology and movement  
228 behaviour of endodermal cells and at later stages differentiated into endodermal tissue derivatives  
229 (Supplementary Figure 4A). Furthermore, DFCs transplanted into the paraxial region of host  
230 embryos, where endodermal and mesodermal progenitors develop, integrated only into endodermal  
231 tissue derivatives (Supplementary Figure 4B). Thus, detached DFCs are prone to leave the cell  
232 cluster being sequestered by the DCL, and in this new environment integrate into the endodermal  
233 cell layer, losing their primal fate. However, this behavior was barely seen in normal development.  
234 Indeed, detached DFCs following the endodermal path were absent in 30% of all analysed embryos  
235 and they represented only a small fraction of the complete pool of detached DFCs in the remaining  
236 70% of cases (Figure 5A). In contrast, the number of detached DFCs increased steadily during  
237 epiboly as cells completed the process of delamination (Figures 3B). These findings prompted us to  
238 investigate how the detached DFC population integrates into the collective movement of attached  
239 DFCs, which is guided by the extra-embryonic tissues. To address this issue, we first analysed how  
240 the detached DFC population evolves during their collective vegetal movement. Immunostaining for  
241 ZO-1 and F-actin revealed that at the onset of epiboly the entire population of DFCs were transiting  
242 the process of delamination and thus were all attached to the YSL and EVL (Figure 5C). However,  
243 as epiboly progressed, detached DFCs steadily increased to outnumber the attached DFC  
244 population from 75% epiboly, and by 90% epiboly they became the predominant pool of DFCs  
245 (Figure 5C). Through time-lapse microscopy, we found that the progressive increase of detached  
246 cells was not only due to DFCs completing the process of delamination (Figure 3B), but detached  
247 DFCs also emerged from events of cell division (Figures 5D and 5E). As previously noted, despite  
248 the continuous increase in the number of detached DFCs, the entire population of DFCs still moved  
249 in direction to the vegetal pole in coordination with the vegetal spreading of extra-embryonic tissues  
250 until advanced stages of epiboly (Figures 5E and 5F). Altogether, these results reveal that the DFC  
251 cluster retains a collective vegetal motion regardless of the progressive expansion of the detached  
252 DFC population, raising the question of how detached DFCs move towards the vegetal pole.

### 253 **DFC-DFC contact interactions integrate detached cells to the vegetal movement of attached** 254 **DFCs providing a clustered collective movement**

255 The observation that most detached DFCs move towards the vegetal pole despite their ability to  
256 migrate away from the DFC cluster and being sequestered by the DCL, suggests that specific  
257 mechanisms integrate these detached cells to the movement of attached DFCs. During epiboly,  
258 DFCs transit from being a collection of scattered progenitors into a tight cellular cluster (Figure 1A;

259 [Supplementary Video 1](#)) ([Oteiza, et al., 2008](#)). DFCs express *e-cadherin* ([Figure 6A](#)) ([Kane, et al.,](#)  
260 [2005](#)) and previous reports have shown that functional abrogation of this adhesion molecule affects  
261 the cluster cohesion of DFCs leading to a scattered organisation of DFCs at 90% of epiboly ([Oteiza,](#)  
262 [et al., 2010](#)). Thus, DFC-DFC adhesion mediated by E-cadherin (E-cad) could fulfil the role of  
263 integrating detached DFCs to the vegetal movement of attached DFCs. Therefore, we tested by  
264 time-lapse microscopy if the directed vegetal movement of detached DFCs requires contact  
265 interactions mediated by E-cad. We found that E-cad knockdown disrupted cluster cohesion, leading  
266 to the creation of multiple small racemes of DFCs that moved in the vegetal direction guided by their  
267 apical attachments with the YSL and EVL ([Figure 6B](#)). Remarkably, the number of detached cells  
268 leaving the DFC collective towards the DCL increased significantly in these embryos ([Figures 6B](#)  
269 [and 6C](#)). These results indicate that DFC-DFC adhesion mediated by E-cad is required for the  
270 recruitment of detached DFCs into the vegetal motion of attached DFCs, promoting the formation of  
271 a tight cellular cluster.

272 Nonetheless, it remained obscure how cells located at long distances in the initially dispersed group  
273 of DFCs approached to each other to establish adhesive contacts. To address this question, we  
274 followed the movement of DFCs by *in vivo* microscopy. Our time-lapse image analysis revealed that  
275 distant DFCs initiated adhesive contacts by sending long polarised protrusions ([Figures 6D, 0 to 17](#)  
276 [min, and 6E; Supplementary Video 7](#)). These protrusions resulted in the establishment of long-term  
277 adhesion among cells initially separated up to a distance of  $52.67 \pm 14.72$  (mean  $\pm$  S.D; n=6 embryos),  
278 allowing the clustering of DFCs ([Figure 6D, 50 min; Supplementary Video 7](#)). Thus, long-range  
279 interactions mediated by protrusions work like seeds for the establishment of stable inter-DFC  
280 adhesion. Remarkably, using transgenic embryos expressing F-actin only in DFCs we observed a  
281 temporal connection between formation of protrusion-mediated adhesive contacts and the loss of  
282 apical attachments. Subsets of scattered DFCs that contained several cells with apical attachments  
283 started to detach from the extra-embryonic tissues only after initiating protrusion-mediated adhesive  
284 contacts with the central cluster of attached DFCs ([Figure 6F, 0 to 16 min; Supplementary Video 8](#)).  
285 Subsequently, they completed the process of delamination when they became fully integrated into  
286 the central DFC cluster ([Figure 6F, 23 to 47 min; Supplementary Video 8](#)). Collectively, these findings  
287 indicate that cell-cell contact interactions among DFCs integrate detached cells to the vegetal  
288 movement of attached cells to guide the clustering and directional vegetal movement of the entire  
289 DFC collective.

290

291

## 292 Discussion

293 Here we show a previously unexplored mechanism of morphogenesis of a small group of progenitor  
294 cells that stems from the mechanistic link between the process of epithelial delamination underlying  
295 progenitor specification and the directed movement of adjacent extra-embryonic tissues. This  
296 morphogenetic mechanism safeguards progenitors from undesired losses while guiding their  
297 directed motion and allocation as a cluster at the site of organ differentiation. In zebrafish, DFCs are  
298 the laterality organ progenitors and arise by delamination from the EVL, an extra-embryonic surface  
299 epithelium that protects the early embryo and at later stages gives rise to the periderm ([Kimmel, et](#)  
300 [al., 1990](#)). When DFCs are formed, the EVL epithelium spreads from the equator to the embryo's  
301 vegetal pole during the movement of epiboly in conjunction with the YSL, an extra-embryonic  
302 syncytium to which the vegetal margin of the EVL is tied. Remarkably, the apical constriction process  
303 underlying DFC delamination follows a temporal progression that allows DFCs to retain long-term  
304 apical attachments with the EVL and YSL as they spread towards the vegetal pole during epiboly.  
305 Apical attachments work as tissue connectors that couple DFCs with the vegetal spreading of extra-  
306 embryonic tissues, guiding their motion towards the site of differentiation at the vegetal pole. In  
307 contrast with previous hypotheses indicating that autonomous motility ([Ablooglu, et al., 2010](#)) and  
308 contact-mediated repulsive interactions with the marginal DCL ([Zhang, et al., 2016](#)) drive DFC  
309 vegetal movement, we show that mechanical drag by extra-embryonic tissue movement provides  
310 the critical guidance cues for DFC directed locomotion. Remarkably, this guidance mechanism is  
311 mediated by apical attachments that stem from an incomplete process of delamination, allowing  
312 DFCs to coordinate their movement with the adjacent extra-embryonic tissues. Epithelial  
313 delamination is a conserved mechanism to generate new mesenchymal cell types in various  
314 developmental contexts ([Thiery, et al., 2009](#); [Shook and Keller, 2003](#)). Here we show that besides  
315 this canonical function, incomplete delamination serves as a generic mechanism for coordinated  
316 tissue movement during development, driving the allocation of newly formed mesenchymal cell  
317 groups.

318 Apical attachments guiding DFC movement arise from a process of apical constriction that depends  
319 on actomyosin contractibility and is asynchronous among DFCs. We show that such asynchrony  
320 generates two distinct populations of progenitors, one holding apical attachments and being pulled  
321 by the vegetal movement of extra-embryonic tissues, and a second population of detached  
322 delaminated DFCs that follows the vegetal movement of apically-attached DFCs through cell-cell  
323 contact mechanisms. In the context of these evolving two populations, having an asynchronous  
324 process of cell delamination potentially increases the chances of maintaining a minimal number of

325 apically-attached DFCs able to carry the detached DFC population along their movements, a factor  
326 that becomes relevant as epiboly progresses and the ratio of attached/detached DFCs decreases.  
327 Furthermore, as apical constriction imposes mechanical stress along the epithelial plane ([Heer and](#)  
328 [Martin, 2017](#); [Martin and Goldstein, 2014](#)) we can speculate that having asynchrony in a collective  
329 process of apical constriction promotes the even dissipation of mechanical stress over time and  
330 space, protecting the integrity of the epithelium. Future work combining mechanical  
331 perturbations/measurements with physical modelling will have to test these hypotheses directly.

332 Delaminated DFCs are intrinsically motile and can move towards the DCL, being sequestered by the  
333 massive internalisation movements of this embryonic cellular domain during gastrulation.  
334 Importantly, when DFCs reach the DCL, either during normal development or after transplantation,  
335 they follow the endodermal path revealing that DFCs have a previously unrecognised potential to  
336 become endoderm that is expressed if they enter the developmental field of the endoderm. Such  
337 potential co-option of DFCs by the endodermal DCL reduces the number of progenitors, and this  
338 can have a detrimental impact on left-right asymmetry development, increasing the incidence of  
339 embryo laterality defects ([Moreno-Ayala, et al., 2020](#)). Here we show that DFCs transiting the  
340 process of delamination avoid endodermal fate by establishing E-cadherin mediated adhesive  
341 contacts with the sub-population of attached DFCs before completing the process of delamination.  
342 Thus, DFC-DFC contact interactions mediated by E-cadherin play a dual function, to protect  
343 delaminated cells from escaping towards the endoderm and to ensure they move together with the  
344 attached DFC population as a collective group. Importantly, DFCs located at long distances establish  
345 adhesive contacts by sending long polarised protrusions whose persistence and directionality differ  
346 from the short random protrusions formed by most DFCs at the edge of the DFC cluster. The  
347 mechanisms underlying the formation of these directed long protrusions are currently unknown.  
348 Notably, recent work shows that migrasomes containing the chemokine ligands Cxcl12a/b become  
349 enriched in the extracellular space surrounding DFCs ([Jiang, et al., 2019](#)) thus opening the possibility  
350 that long polarised protrusions are a manifestation of a chemoattraction mechanism. It is also  
351 remarkable the observation that sub-clusters of DFCs delaminate only after establishing adhesive  
352 contacts with the main DFC cluster suggesting a mechanistic coupling between the cell adhesion,  
353 cell motility and the process of delamination, which will be interesting to explore in future work.  
354 Together, these findings provide a novel developmental function for E-cadherin, mediating the  
355 transfer of movement information between two distinct populations of progenitor cells defined by  
356 their state in the delamination process: attached (transiting delamination) and detached  
357 (delaminated). Remarkably, motion transfer from attached to detached DFCs resembles the leader-  
358 to-follower motion transmission observed in events of collective cell locomotion, many of which also

359 require cadherin-dependent cell-cell contact interactions (Reig, et al., 2014; Theveneau and Mayor,  
360 2013; Friedl and Gilmour, 2009). In the case of DFCs, the role of E-cadherin in motion transmission  
361 complements the previously described function in clusterisation (Matsui, et al., 2011; Oteiza, et al.,  
362 2010; Hong and Dawid, 2009), and together ensure that progenitors reach the site of terminal  
363 differentiation in a sufficient number and organised as a tight collective, a prerequisite to proceed  
364 into further stages of organogenesis (Oteiza, et al., 2010; Oteiza, et al., 2008).

365 Developmental cases of cells being dragged through physical bonds with adjacent tissues have  
366 recently begun to be reported. Among them, *C elegans* primordial germ cells internalise during  
367 gastrulation due to cohesive contacts that these cells establish with the moving ingressing endoderm  
368 (Chihara and Nance, 2012). In annual killifish, the embryonic DCL spreads during epiboly as a result  
369 of adhesive contacts with the basal epithelial domain of the expanding EVL (Reig, et al., 2017). In  
370 zebrafish, the vegetal spreading of the EVL during epiboly follows the autonomous movement of the  
371 YSL to which is tightly bonded at its margin by TJ complexes (Schwayer, et al., 2019; Behrndt, et  
372 al., 2012; Koppen, et al., 2006; Betchaku and Trinkaus, 1978). Therefore, mechanical drag is an  
373 emergent cell movement mechanism whose extent and impact during embryo morphogenesis needs  
374 to be further investigated. Here we show that drag-mediated locomotion is a crucial driver of  
375 organogenesis that emerges at the interface of embryonic and extra-embryonic cellular domains  
376 highlighting the essential role of mechanical information from extra-embryonic tissues in driving early  
377 embryo development (Christodoulou, et al., 2019; Reig, et al., 2017; Hiramatsu, et al., 2013).

378

## 379 **Acknowledgements**

380 We thank the bioimaging and zebrafish facilities of ICBM-U.Chile and IST Austria for continuous  
381 support. We also thank Felipe Santibañez and Mauricio Cerda for providing algorithms for image  
382 analysis.

383

## 384 **Competing interests**

385 The authors declare that no competing interests exist.

## 386 References

- 387 Ablooglu, A.J., Tkachenko, E., Kang, J., and Shattil, S.J. (2010). Integrin alphaV is necessary for  
388 gastrulation movements that regulate vertebrate body asymmetry. *Development (Cambridge,*  
389 *England)* 137, 3449-58.
- 390 Alexander, J., and Stainier, D.Y. (1999). A molecular pathway leading to endoderm formation in  
391 zebrafish. *Curr Biol* 9, 1147-57.
- 392 Barth, K.A., and Wilson, S.W. (1995). Expression of zebrafish nk2.2 is influenced by sonic  
393 hedgehog/vertebrate hedgehog-1 and demarcates a zone of neuronal differentiation in the  
394 embryonic forebrain. *Development (Cambridge, England)* 121, 1755-68.
- 395 Behrndt, M., Salbreux, G., Campinho, P., Hauschild, R., Oswald, F., Roensch, J., Grill, S.W., and  
396 Heisenberg, C.P. (2012). Forces driving epithelial spreading in zebrafish gastrulation. *Science* 338,  
397 257-60.
- 398 Betchaku, T., and Trinkaus, J.P. (1978). Contact relations, surface activity, and cortical  
399 microfilaments of marginal cells of the enveloping layer and of the yolk syncytial and yolk cytoplasmic  
400 layers of fundulus before and during epiboly. *J Exp Zool* 206, 381-426.
- 401 Bruce, A.E.E., and Heisenberg, C.P. (2020). Mechanisms of zebrafish epiboly: A current view. *Curr*  
402 *Top Dev Biol* 136, 319-341.
- 403 Cheng, J.C., Miller, A.L., and Webb, S.E. (2004). Organization and function of microfilaments during  
404 late epiboly in zebrafish embryos. *Dev Dyn* 231, 313-23.
- 405 Chihara, D., and Nance, J. (2012). An E-cadherin-mediated hitchhiking mechanism for *C. elegans*  
406 germ cell internalization during gastrulation. *Development* 139, 2547-56.
- 407 Christodoulou, N., Weberling, A., Strathdee, D., Anderson, K.I., Timpson, P., and Zernicka-Goetz,  
408 M. (2019). Morphogenesis of extra-embryonic tissues directs the remodelling of the mouse embryo  
409 at implantation. *Nat Commun* 10, 3557.
- 410 Cooper, M.S., and D'Amico, L.A. (1996). A cluster of noninvoluting endocytic cells at the margin of  
411 the zebrafish blastoderm marks the site of embryonic shield formation. *Developmental biology* 180,  
412 184-98.
- 413 Dalle Nogare, D., and Chitnis, A.B. (2017). A framework for understanding morphogenesis and  
414 migration of the zebrafish posterior Lateral Line primordium. *Mech Dev* 148, 69-78.
- 415 Essner, J.J., Amack, J.D., Nyholm, M.K., Harris, E.B., and Yost, H.J. (2005). Kupffer's vesicle is a  
416 ciliated organ of asymmetry in the zebrafish embryo that initiates left-right development of the brain,  
417 heart and gut. *Development* 132, 1247-60.
- 418 Friedl, P., and Gilmour, D. (2009). Collective cell migration in morphogenesis, regeneration and  
419 cancer. *Nat Rev Mol Cell Biol* 10, 445-57.
- 420 Heer, N.C., and Martin, A.C. (2017). Tension, contraction and tissue morphogenesis. *Development*  
421 *(Cambridge, England)* 144, 4249-4260.
- 422 Heisenberg, C.P., and Bellaiche, Y. (2013). Forces in tissue morphogenesis and patterning. *Cell*  
423 153, 948-62.
- 424 Heissler, S.M., and Sellers, J.R. (2016). Various Themes of Myosin Regulation. *J Mol Biol* 428, 1927-  
425 46.

- 426 Hiramatsu, R., Matsuoka, T., Kimura-Yoshida, C., Han, S.W., Mochida, K., Adachi, T., Takayama,  
427 S., and Matsuo, I. (2013). External mechanical cues trigger the establishment of the anterior-  
428 posterior axis in early mouse embryos. *Dev Cell* 27, 131-144.
- 429 Hong, S.K., and Dawid, I.B. (2009). FGF-dependent left-right asymmetry patterning in zebrafish is  
430 mediated by *lrr2* and *Fibp1*. *Proc Natl Acad Sci U S A* 106, 2230-5.
- 431 Jayashankar, V., Nguyen, M.J., Carr, B.W., Zheng, D.C., Rosales, J.B., Rosales, J.B., and Weiser,  
432 D.C. (2013). Protein phosphatase 1 beta paralogs encode the zebrafish myosin phosphatase  
433 catalytic subunit. *PLoS One* 8, e75766.
- 434 Jiang, D., Jiang, Z., Lu, D., Wang, X., Liang, H., Zhang, J., Meng, Y., Li, Y., Wu, D., Huang, Y., et  
435 al. (2019). Migrasomes provide regional cues for organ morphogenesis during zebrafish gastrulation.  
436 *Nat Cell Biol* 21, 966-977.
- 437 Kane, D.A., McFarland, K.N., and Warga, R.M. (2005). Mutations in half baked/E-cadherin block cell  
438 behaviors that are necessary for teleost epiboly. *Development* 132, 1105-16.
- 439 Keller, P.J., Schmidt, A.D., Wittbrodt, J., and Stelzer, E.H. (2008). Reconstruction of zebrafish early  
440 embryonic development by scanned light sheet microscopy. *Science* 322, 1065-9.
- 441 Kimmel, C.B., Warga, R.M., and Schilling, T.F. (1990). Origin and organization of the zebrafish fate  
442 map. *Development (Cambridge, England)* 108, 581-94.
- 443 Koppen, M., Fernandez, B.G., Carvalho, L., Jacinto, A., and Heisenberg, C.P. (2006). Coordinated  
444 cell-shape changes control epithelial movement in zebrafish and *Drosophila*. *Development*  
445 (Cambridge, England) 133, 2671-81.
- 446 Kramer-Zucker, A.G., Olale, F., Haycraft, C.J., Yoder, B.K., Schier, A.F., and Drummond, I.A. (2005).  
447 Cilia-driven fluid flow in the zebrafish pronephros, brain and Kupffer's vesicle is required for normal  
448 organogenesis. *Development* 132, 1907-21.
- 449 Maitre, J.L., Berthoumieux, H., Krens, S.F., Salbreux, G., Julicher, F., Paluch, E., and Heisenberg,  
450 C.P. (2012). Adhesion functions in cell sorting by mechanically coupling the cortices of adhering  
451 cells. *Science* 338, 253-6.
- 452 Martin, A.C., and Goldstein, B. (2014). Apical constriction: themes and variations on a cellular  
453 mechanism driving morphogenesis. *Development* 141, 1987-98.
- 454 Matsui, T., and Bessho, Y. (2012). Left-right asymmetry in zebrafish. *Cell Mol Life Sci* 69, 3069-77.
- 455 Matsui, T., Thitamadee, S., Murata, T., Kakinuma, H., Nabetani, T., Hirabayashi, Y., Hirate, Y.,  
456 Okamoto, H., and Bessho, Y. (2011). Canopy1, a positive feedback regulator of FGF signaling,  
457 controls progenitor cell clustering during Kupffer's vesicle organogenesis. *Proc Natl Acad Sci U S A*  
458 108, 9881-6.
- 459 Moreno-Ayala, R., Olivares-Chauvet, P., Schäfer, R., and Junker, J.P. (2020). Variability of an early  
460 developmental cell population underlies stochastic laterality defects. *bioRxiv*, 2020.07.20.212282.
- 461 Oteiza, P., Koppen, M., Concha, M.L., and Heisenberg, C.P. (2008). Origin and shaping of the  
462 laterality organ in zebrafish. *Development (Cambridge, England)* 135, 2807-13.
- 463 Oteiza, P., Koppen, M., Krieg, M., Pulgar, E., Farias, C., Melo, C., Preibisch, S., Muller, D., Tada,  
464 M., Hartel, S., et al. (2010). Planar cell polarity signalling regulates cell adhesion properties in  
465 progenitors of the zebrafish laterality organ. *Development (Cambridge, England)* 137, 3459-68.
- 466 Pinheiro, D., and Heisenberg, C.P. (2020). Zebrafish gastrulation: Putting fate in motion. *Curr Top*  
467 *Dev Biol* 136, 343-375.

- 468 Reig, G., Cerda, M., Sepulveda, N., Flores, D., Castaneda, V., Tada, M., Hartel, S., and Concha,  
469 M.L. (2017). Extra-embryonic tissue spreading directs early embryo morphogenesis in killifish. *Nat*  
470 *Commun* 8, 15431.
- 471 Reig, G., Pulgar, E., and Concha, M.L. (2014). Cell migration: from tissue culture to embryos.  
472 *Development* (Cambridge, England) 141, 1999-2013.
- 473 Richardson, B.E., and Lehmann, R. (2010). Mechanisms guiding primordial germ cell migration:  
474 strategies from different organisms. *Nat Rev Mol Cell Biol* 11, 37-49.
- 475 Sakaguchi, T., Kikuchi, Y., Kuroiwa, A., Takeda, H., and Stainier, D.Y. (2006). The yolk syncytial  
476 layer regulates myocardial migration by influencing extracellular matrix assembly in zebrafish.  
477 *Development* (Cambridge, England) 133, 4063-72.
- 478 Schindelin, J., Arganda-Carreras, I., Frise, E., Kaynig, V., Longair, M., Pietzsch, T., Preibisch, S.,  
479 Rueden, C., Saalfeld, S., Schmid, B., et al. (2012). Fiji: an open-source platform for biological-image  
480 analysis. *Nat Methods* 9, 676-82.
- 481 Schwayer, C., Shamipour, S., Pranjic-Ferscha, K., Schauer, A., Balda, M., Tada, M., Matter, K., and  
482 Heisenberg, C.P. (2019). Mechanosensation of Tight Junctions Depends on ZO-1 Phase Separation  
483 and Flow. *Cell* 179, 937-952 e18.
- 484 Shook, D., and Keller, R. (2003). Mechanisms, mechanics and function of epithelial-mesenchymal  
485 transitions in early development. *Mech Dev* 120, 1351-83.
- 486 Theveneau, E., and Mayor, R. (2013). Collective cell migration of epithelial and mesenchymal cells.  
487 *Cell Mol Life Sci* 70, 3481-92.
- 488 Thiery, J.P., Aclouque, H., Huang, R.Y., and Nieto, M.A. (2009). Epithelial-mesenchymal transitions  
489 in development and disease. *Cell* 139, 871-90.
- 490 Warga, R.M., and Kane, D.A. (2018). A Wilson cell origin for Kupffer's vesicle in the zebrafish. *Dev*  
491 *Dyn*.
- 492 Westerfield, M. (2000). *The zebrafish book. A guide for the laboratory use of zebrafish (Danio rerio)*  
493 (Eugene: University of Oregon Press)
- 494 Woo, S., Housley, M.P., Weiner, O.D., and Stainier, D.Y. (2012). Nodal signaling regulates  
495 endodermal cell motility and actin dynamics via Rac1 and Prex1. *J Cell Biol* 198, 941-52.
- 496 Zhang, J., Jiang, Z., Liu, X., and Meng, A. (2016). Eph/ephrin signaling maintains the boundary of  
497 dorsal forerunner cell cluster during morphogenesis of the zebrafish embryonic left-right organizer.  
498 *Development* (Cambridge, England) 143, 2603-15.
- 499  
500  
501



502 **Figures**

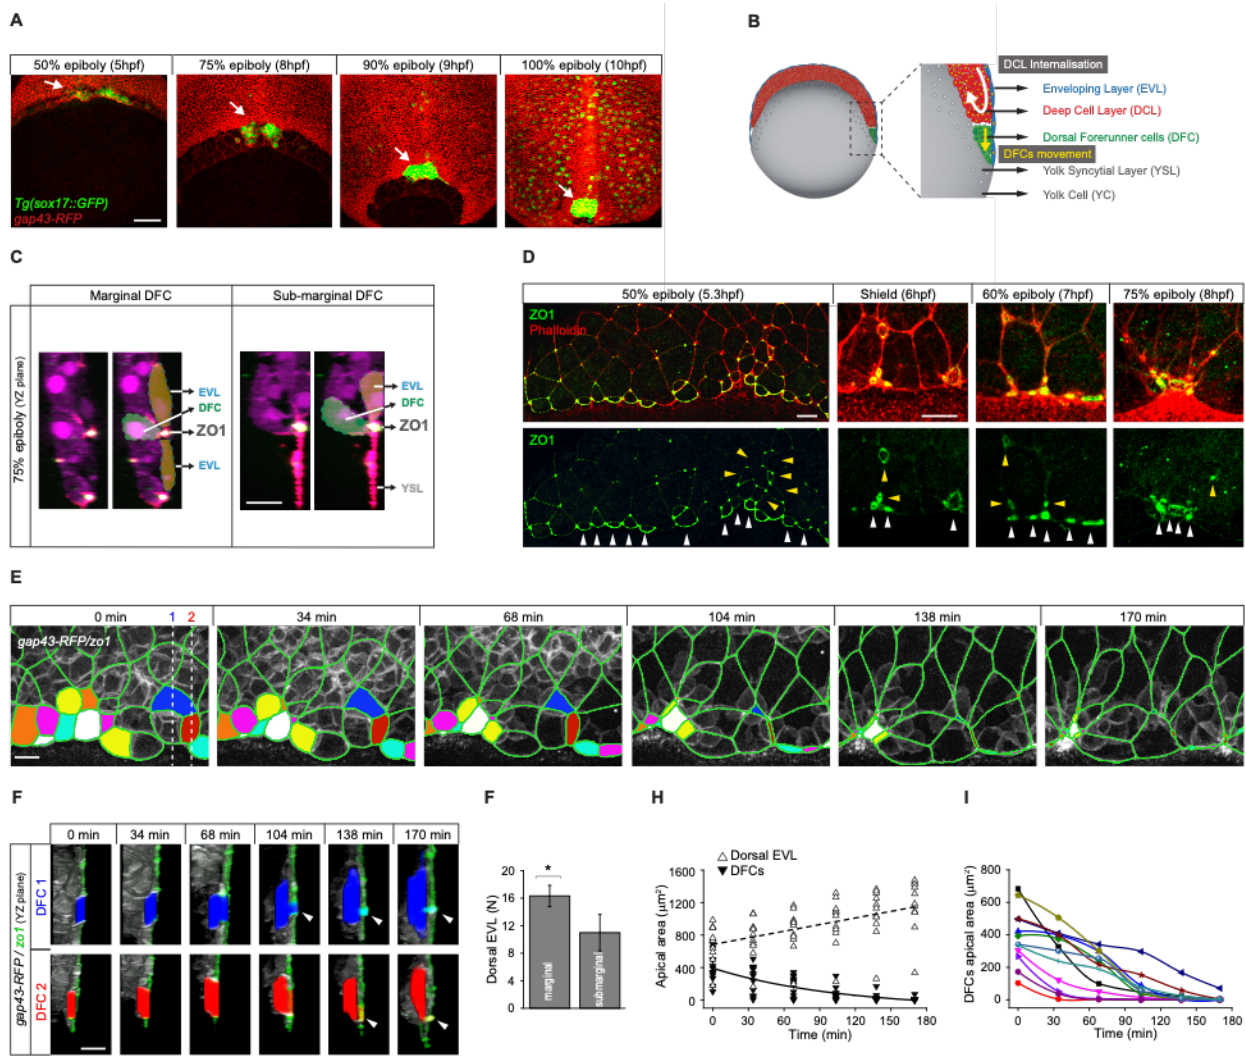

503

504 **Figure 1. DFCs delaminate by apical constriction and retain apical attachments with the**  
 505 **and YSL.** (A) Dorsal views of confocal z-stack maximum projections showing the collective vegetal  
 506 motion of DFCs between shield stage and 100% epiboly in a representative *Tg(sox17::GFP)* embryo  
 507 injected with *gap43-RFP* mRNA. DFCs are in green (arrows) while the plasma membrane of all cells  
 508 is in red. Note that the *sox17::GFP* transgene also labels the scattered population of endodermal  
 509 cells at advances stages of epiboly (extracted from [Supplementary Video 1](#)). Scale bar, 100  $\mu\text{m}$ . (B)  
 510 Schematic diagram of a cross section along the sagittal plane of the zebrafish embryo at 60% of  
 511 epiboly. DFCs move to the vegetal pole ahead of the DCL margin, where mesendodermal  
 512 progenitors internalise. (C) Confocal microscopy zy-plane in 75% epiboly embryos stained with

513 phalloidin and ZO-1 (merge channels), showing marginal (left) and submarginal (right) ingressing  
514 DFCs connected with the EVL and YSL by focal apical attachments enriched in ZO-1 and F-actin.  
515 Scale bars, 20  $\mu\text{m}$ . (D) Phalloidin and ZO-1 immunostaining (merge on top and ZO-1 on bottom) of  
516 the dorsal margin of wild type embryos between 50% and 75% epiboly. Images correspond to  
517 surface confocal sections showing the apical domains of delaminating DFCs in contact with the EVL  
518 and YSL (arrowheads). Scale bar, 20  $\mu\text{m}$ . (E) Time series of dorsal views of confocal z-stack  
519 maximum projections of a representative embryo injected with *zo1-GFP* and *gap43-RFP* between  
520 50% and 80% epiboly, showing EVL cell junctions (green outlines) and the apical domains of EVL  
521 cells as they delaminate to become DFCs (coloured areas) (extracted from [Supplementary Video](#)  
522 [2](#)). Scale bar, 20  $\mu\text{m}$ . (F) Time series of confocal z-sections showing two DFCs taken from panel E  
523 in lateral views (blue and red cells) as they move below the plane of the EVL epithelium during the  
524 process of delamination. Note that delaminating DFCs retain a focal apical attachment with the EVL  
525 (arrowhead, top) and YSL (arrowhead, bottom). Scale bars, 20  $\mu\text{m}$ . (G) Quantification of the number  
526 of dorsal EVL cells undergoing delamination to become DFCs at both marginal and submarginal  
527 positions, expressed as means  $\pm$  s.d. \* ( $p < 0.05$ ). (H) Temporal changes in apical area of DFCs (black  
528 triangles) and neighbouring dorsal EVL cells (white triangles) in a representative embryo during the  
529 process of delamination. Continuous and dashed lines indicate the mean values of apical area of  
530 DFCs and dorsal EVL cells, respectively. (I) Temporal changes in apical area of individual DFCs in  
531 a representative embryo during the process of delamination. Each curve corresponds to a single  
532 cell. Animal is to the top in all panels.

533

534

535

536

537

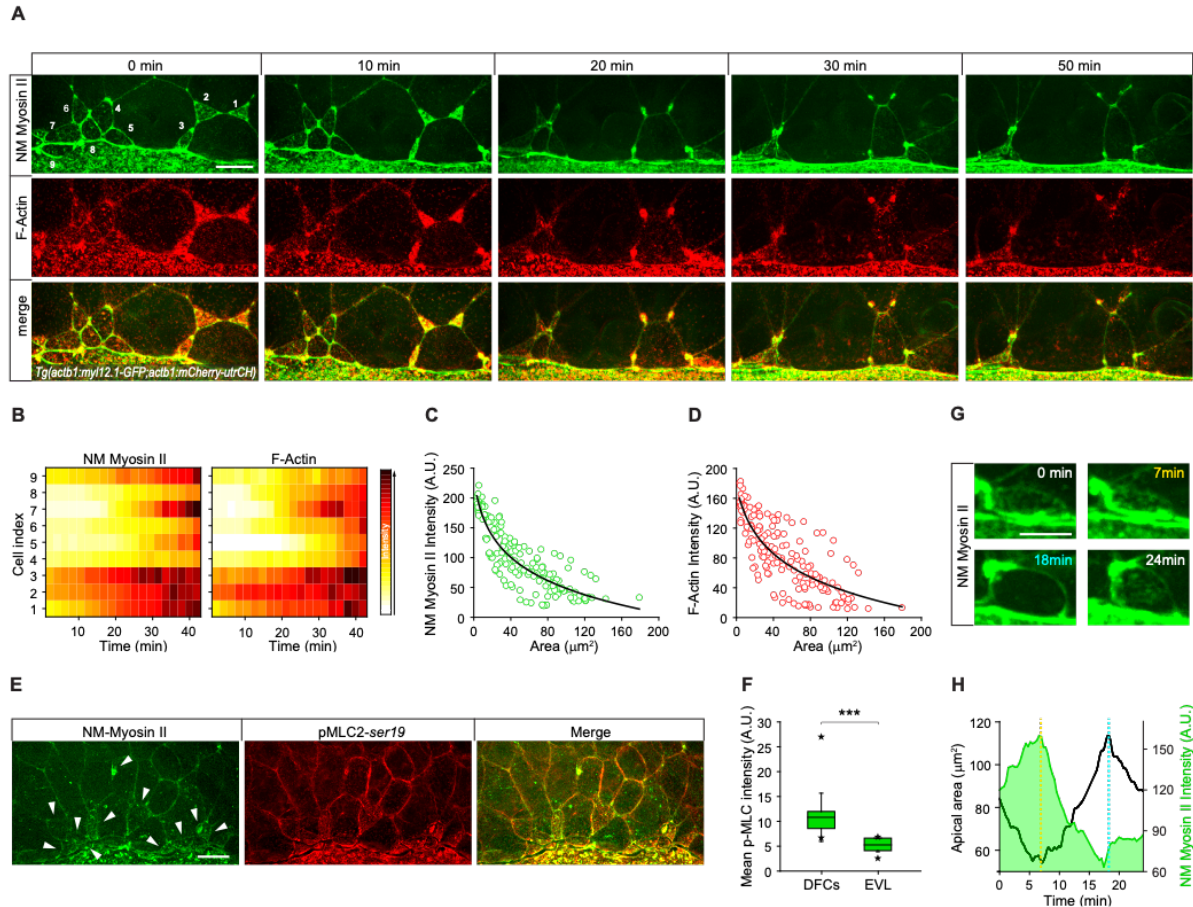

538

539

540 **Figure 2. DFC apical constriction is mediated by actomyosin dynamics.** (A) Time series of  
 541 dorsal views of confocal z-stack maximum projections of a representative *Tg(actb1:myl12.1-*  
 542 *GFP;lifeactin-RFP)* embryo starting at shield stage, showing the progressive accumulation of NM  
 543 myosin II (green, top) and F-actin (red, middle) at the apical surface of delaminating DFCs. The  
 544 merge image of NM myosin and F-actin is shown at the bottom. Scale bar, 20  $\mu\text{m}$ . (B) Heat maps  
 545 showing the temporal changes in the fluorescence intensity levels of apical NM myosin II (left) and  
 546 F-actin (right) for individual DFCs in a representative *Tg(actb1:myl12.1-GFP;lifeactin-RFP)* embryo,  
 547 according to the colour scale shown on the right. Each value corresponds to the average fluorescent  
 548 intensity for a single cell over a 2.1 min time window. (C and D) Changes in the mean fluorescent  
 549 intensity levels per pixel of apical NM myosin II (C) and F-actin (D) as a function of the changes in  
 550 DFC apical area during the process of DFC apical constriction. Dots correspond to values of  
 551 individual DFCs and lines to the fitted curves, taken from a representative *Tg(actb1:myl12.1-*  
 552 *GFP;lifeactin-RFP)* embryo. (E) Dorsal views of the margin of *Tg(actb1:myl12.1-GFP)* embryos at  
 553 75% epiboly immunostained to reveal total NM myosin II (green, left), phospho-myosin light chain II  
 554 (middle) and merge (right). Arrowheads point to the apical surface of delaminating DFCs. Scale bar,

555 20  $\mu\text{m}$ . (F) Quantification of the fluorescent intensity levels of phospho-myosin light chain II at the  
556 apical surface of DFCs and neighbouring dorsal EVL cells. The box depicts the interquartile range  
557 from 25% to 75% of the data around the average (vertical line inside the box), the whisker depicts  
558 s.d., and stars indicate maximum and minimum values (n=3 embryos). \*\*\* ( $p < 0.001$ ). (G) Example  
559 of a representative DFC showing spontaneous consecutive apical loss and recovery of myosin II  
560 accumulation during the process of apical constriction (extracted from [Supplementary Video 3](#)).  
561 Scale bar, 10  $\mu\text{m}$ . (H) Quantification of the temporal evolution of apical area and myosin II intensity  
562 of the cell shown in G, during the consecutive stages of loss and recovery of apical myosin II. The  
563 dashed yellow and light blue lines depict the minimum and maximum values of apical area, which  
564 coincide with the maximum and minimum values of apical area during the period of analysis,  
565 respectively.

566

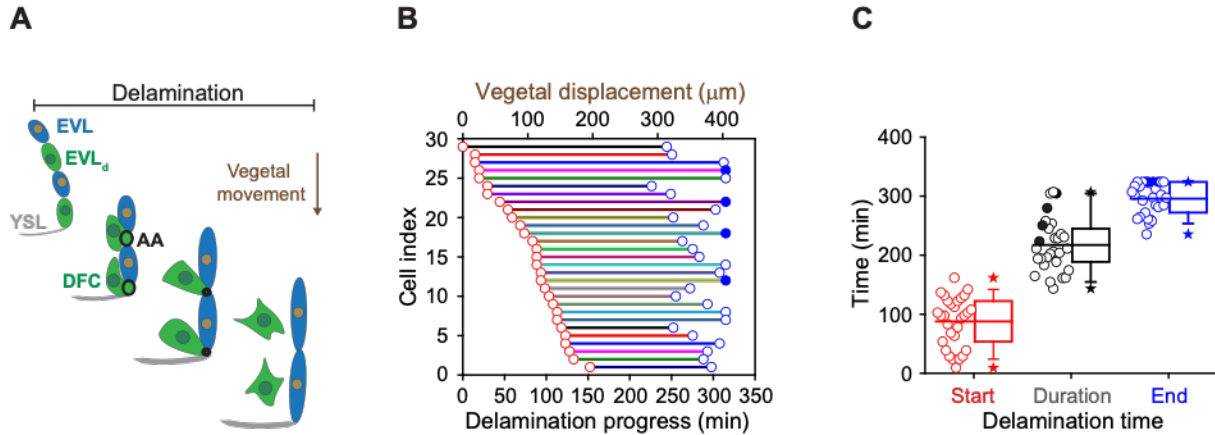

567

568

569 **Figure 3. DFC delamination is asynchronous and coexists with the vegetal motion of DFCs.**(A)  
570 Schematic diagram showing the origin of DFCs from the EVL through cell delamination. Apical  
571 attachments (AA) that result from apical constriction connect DFCs with the EVL and YSL during  
572 their vegetal movements. When DFCs complete delamination, they loose apical attachments and  
573 are released from the EVL. (B) Plot depicting the relationship between the time of the delamination  
574 process and the vegetal movements of DFCs for a single representative *Tg(actb1:lifeactin-RFP)*  
575 embryo. The start (red circles) and end (blue circles) times of cell delamination, and the total duration  
576 of this process (horizontal lines) are shown for individual DFCs (bottom axis) and compared with  
577 their vegetal movements (top axis). Filled blue circles indicate a subset of DFCs that still retained  
578 apical attachments by the end of the movies. (C) Combined box and distribution plots of the start  
579 and end times, and of the total duration of cell delamination for the same representative embryo as  
580 in B. Circles correspond to individual values while the box depicts the interquartile range from 25%  
581 to 75% of the data around the average (vertical line inside the box), the whisker depicts s.d., and  
582 stars indicate maximum and minimum values. Filled blue and black circles indicate the subsets of  
583 DFCs that still retained apical attachments by the end of the movies.

584

585

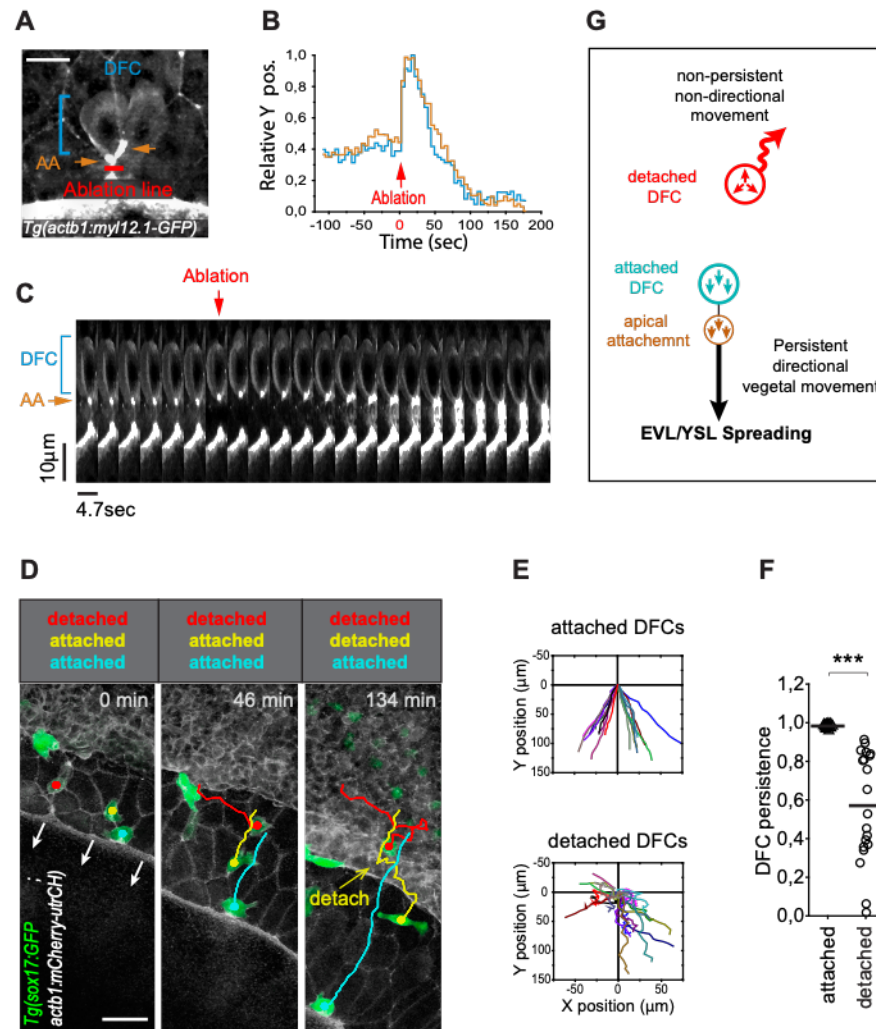

586

587

588 **Figure 4. Apical attachments transmit extra-embryonic tissue spreading to guide DFC vegetal**  
 589 **movement.** (A-C) Laser line ablation of an EVL cortical junction below the apical attachments of two  
 590 submarginal DFCs in a *Tg(actb1::myl12.1-GFP)* embryo at 70% of epiboly. (A) Dorsal view of a pre-  
 591 ablation stage showing DFCs (blue bracket), apical attachments (AA, orange arrows) and the  
 592 ablation line (red). (B) Plot showing the relative position of DFCs (blue) and apical attachments  
 593 (orange) along the y-axis before and after ablation, with zero corresponding to the time of the laser  
 594 pulse (red arrow). (C) Kymograph of DFC and apical attachment movements during the laser  
 595 ablation plotted in B (extracted from [Supplementary Video 4](#)). Scale bars, 20 μm. (D-F) Tracking of  
 596 isolated DFCs obtained from dorsal views of confocal z-stack maximum projections of living 60%  
 597 epiboly *Tg(sox17::GFP;actb1::mCherry-utrCH)* embryos (D, extracted from [Supplementary Video 5](#)).  
 598 Plots show the differences in movement directionality (E) and persistence (F) between attached and

599 detached DFCs (n=22 attached DFCs from 11 embryos, 20 detached DFCs from 8 embryos). \*\*\* ( $p$   
600 < 0.001). Animal is to the top in D. Scale bar, 50. (G) Schematic diagram showing the proposed  
601 drag-mediated mechanism guiding the motion of attached DFCs. Tension generated by YSL/EVL  
602 vegetal spreading is transmitted to DFCs through apical attachments to guide their vegetal  
603 movements. Isolated DFCs devoid of apical attachments (detached) are insensible to YSL/EVL  
604 tensile forces and show non-directional movements.

605

606

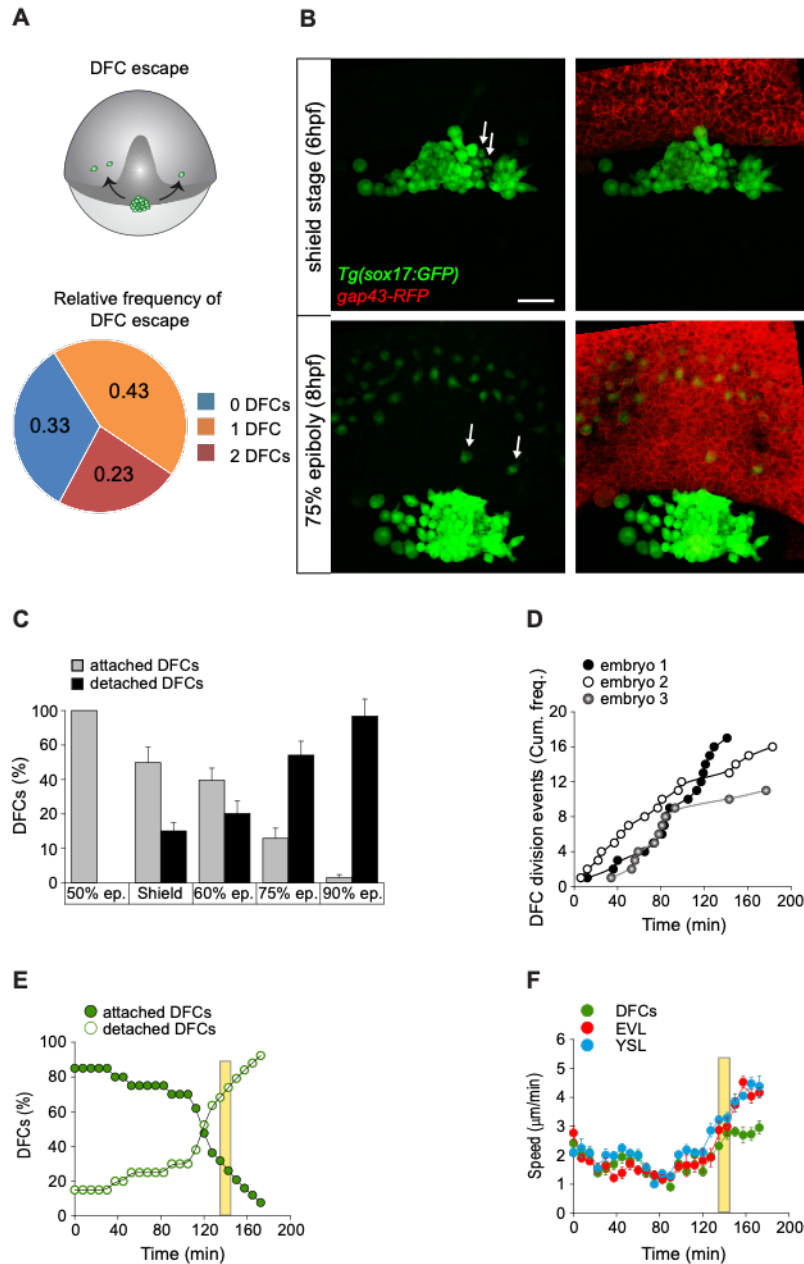

607

608

609 **Figure 5. DFCs move to vegetal pole as a collective despite the increase of detached cells.**

610 (A and B) Individual detached DFCs can leave the main cluster towards the DCL during normal  
 611 development. (A) Schematic diagram showing events of escape (top) and quantification of escaped  
 612 detached DFCs after *in vivo* imaging of *Tg(sox17::GFP)* embryos (bottom, n=30 embryos). (B)  
 613 Dorsal views of confocal z-stack maximum projections at shield stage (top) and 75% epiboly (bottom)  
 614 of a representative *Tg(sox17::GFP)* embryo injected with *gap43-RFP* mRNA, labelling DFCs in  
 615 green and the plasma membrane of all cells in red (extracted from [Supplementary Video 6](#)). Arrows



616 indicate two detached DFCs leaving the main cluster towards the DCL. These cells then mimic the  
617 behaviour of endodermal cells and differentiate into endodermal tissue derivatives (Fig. S4). Animal  
618 is to the top. Scale bar, 50  $\mu\text{m}$ . (C-E) Origin and progressive increase of detached DFCs during  
619 development. (C) Quantification of attached and detached DFCs between 50% and 90% epiboly  
620 (5.3-9 hpf), as determined from fixed embryos stained with phalloidin and ZO-1 (see Figures 1C and  
621 1D). Values correspond to means  $\pm$  s.d. (n=10 embryos per stage). (D) Kinetic of cumulative  
622 frequency of DFC division events in 3 representative embryos. (E) *In vivo* kinetics of attached and  
623 detached DFCs in a representative living Tg(*sox17::GFP*) embryo injected with *lifeactin-mcherry*  
624 mRNA to label F-actin. Plot shows the percentage of attached (filled green circles) and detached  
625 (empty green circles) DFCs over time. (F) *In vivo* progression in the movement speed of the DFC  
626 cluster (green), EVL (red) and the actomyosin ring of the YSL (blue) in the same embryo as in E. In  
627 E and F, movies started at shield stage and extended until 90% epiboly. The vertical yellow bar  
628 indicates the stage when the movement of DFCs uncouples from the vegetal movement of the EVL  
629 and YSL (around 80% epiboly, when detached DFCs reach ~80%).

630

631

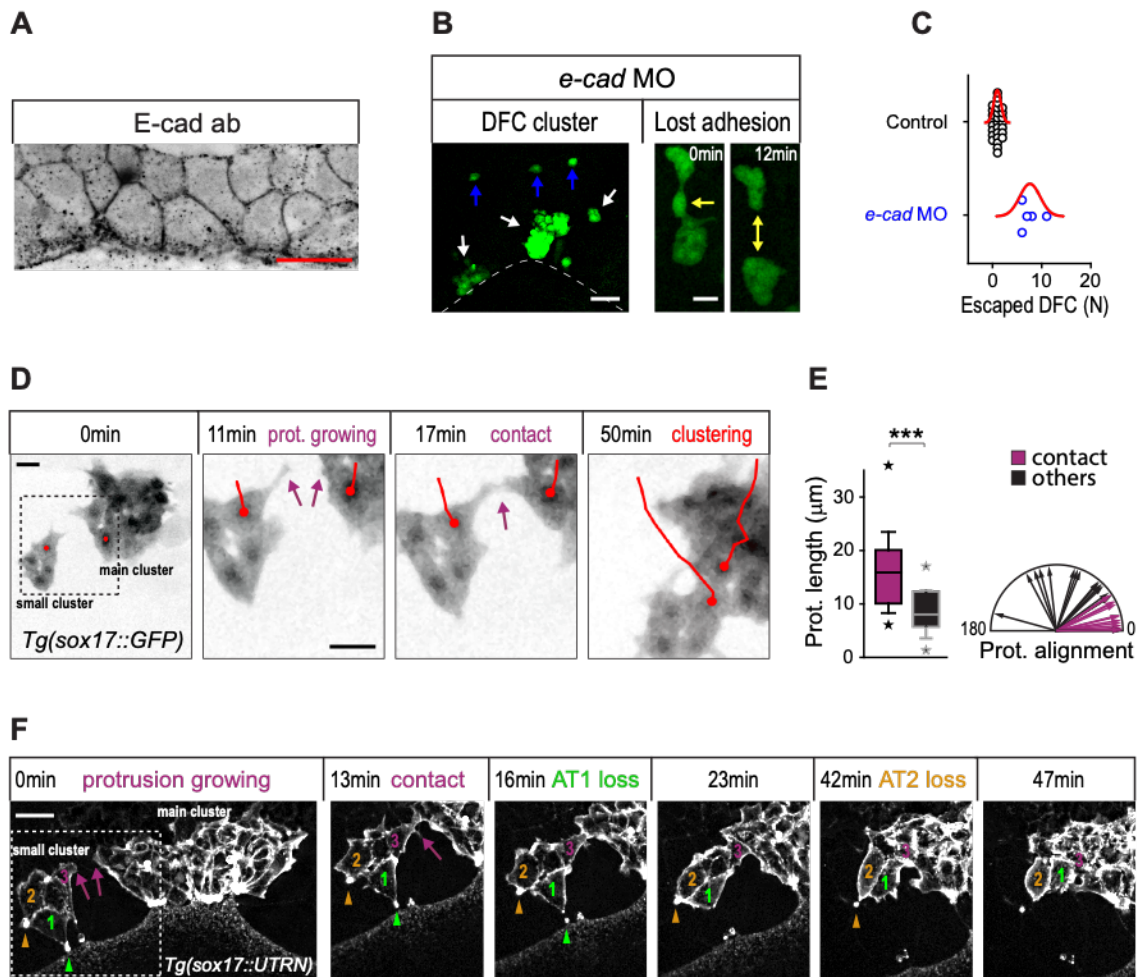

632

633

634 **Figure 6. Contact interactions between DFCs couple the motion of attached and detached cell**  
 635 **promoting a clustered collective movement.** (A) Single confocal plane view of E-cad  
 636 immunostaining in DFCs in a representative 60% epiboly embryo. Scale bar, 20  $\mu\text{m}$ . (B) Dorsal views  
 637 of confocal z-stack maximum projections of DFCs from representative *Tg(sox17::GFP)* embryos  
 638 injected with *e-cad* MO showing the defective collective organisation into multiple racemes (left,  
 639 white arrows), the increase of escaped cells (left, blue arrows) and the loss of DFC-DFC  
 640 adhesive contacts (right; arrow indicates the contact and double-arrow the loss of contact). Scale bars, 50  $\mu\text{m}$   
 641 (left) and 20  $\mu\text{m}$  (right). (C) Distribution of DFC escape events observed in control and *e-cad* MO  
 642 injected embryos (n=5 for *e-cad* MO, n=30 for controls). (D) Temporal confocal series of DFCs from  
 643 a *Tg(sox17::GFP)* embryo showing long protrusions (purple arrows) contacting DFCs from  
 644 neighbouring clusters. After the initial contact, DFCs from the lateral small cluster approach and  
 645 establish adhesive contacts with the main cluster (red lines). Scale bars, 20  $\mu\text{m}$ . (E) Quantification  
 646 of the length (left) and directionality angle (right) of long protrusions involved in DFC-DFC contacts

647 (purple, n=5 embryos) and other protrusions (black, n=5 embryos). \*\*\* ( $p < 0.001$ ). (F) Temporal  
648 confocal series from a representative Tg(*sox17::utrn-GFP*) embryo showing a DFC from a small  
649 lateral cluster (cell 3) sending long protrusions and establishing adhesive contacts with the main  
650 cluster before other DFCs from the small cluster (1 and 2) lose apical attachments (arrowheads)  
651 (extracted from [Supplementary Video 8](#)). Scale bar, 20  $\mu\text{m}$ .

652

653

654

## 655 **Material and Methods**

### 656 **Fish Strains and Maintenance**

657 Zebrafish (*Danio rerio*) strains were maintained and raised according to previously published  
658 procedures (Westerfield, 2000). Embryos were grown in E3 solution at 28°C and staged according  
659 to morphology. Fish care and procedures were approved by the Ethical Review Committee and  
660 comply with the Animals Scientific Procedures Act 0466. Zebrafish strains used were: wild type AB,  
661 Tg(*actb1::myl12.1-eGFP*) (Behrndt, et al., 2012), Tg(*sox17::utm-GFP*) (Woo, et al., 2012),  
662 Tg(*sox17::GFP*) (Sakaguchi, et al., 2006), Tg(*actb1::mCherry-utrCH*) (Behrndt, et al., 2012) and  
663 Tg(*actb1::myl12.1-eGFP; actb1::mCherry-utrCH*).

### 664 **Morpholino and mRNA injections**

665 Synthetic mRNA was produced using the SP6 mMessage mMachine kit (Thermo Fisher Scientific).  
666 Glass capillaries (BF100-98-15, Sutter Instruments) were pulled using a needle puller (P-97, Sutter  
667 Instruments) and mounted on a microinjection system (Picospritzer III, Parker Hannifin). Embryos  
668 were microinjected at the 1-cell stage as previously described (Barth and Wilson, 1995), unless  
669 stated otherwise. 100 pg of *Gap43-RFP* (Reig, et al., 2017) or 40 pg of *lifeACT-RFP* (Behrndt, et al.,  
670 2012) mRNA or *h2b-GFP* (Keller, et al., 2008) were injected as a counterstain for whole embryo  
671 visualisation. 20 pg of *zo1-GFP* mRNA was injected to label apical junctions during DFC  
672 delamination (Schwayer, et al., 2019). 75 pg of *N-ter(1-300aa)-Mypt1* mRNA (Jayashankar, et al.,  
673 2013) was injected into the yolk cell at 3.3 hpf for functional inhibition of the actomyosin network in  
674 the YSL. 2 ng of *cdh1* MO (5'- TAAATCGCAGCTCTTCCTTCCAACG -3', GeneTools) (Maitre, et al.,  
675 2012) was injected to abrogate *cdh1* function.

### 676 **Immunohistochemistry**

677 Embryos between 50% and 90% of epiboly (5.3-9 hpf) were fixed and stained as described  
678 previously (Oteiza, et al., 2008). Embryos were mounted on agarose-coated dishes embedded in  
679 1% low melting-point agarose. Samples were imaged on a Leica TCS LSI Confocal microscope with  
680 HCS software using a 5x objective and 488/520 ( $\lambda_{exc}/\lambda_{em}$ ) lasers. The following antibodies and  
681 dilutions were used: mouse anti-ZO-1 (339100 Invitrogen, 1:200), anti-pMLC2 (3671 Cell Signaling,  
682 1:200), anti-Cdh1 (MPI-CBG #174, 1:200), goat anti-mouse Alexa Fluor 488 (A-11001, Thermo  
683 Fisher Scientific) and goat anti-rabbit Alexa Fluor 568 (A-110011, Thermo Fisher Scientific).

### 684 **Whole embryo confocal imaging**

685 Tg(*sox17::GFP*) embryos injected with 50 pg of *gap43-RFP* mRNA were mounted in 0.5% low  
686 melting point agarose in a custom designed chamber at either dome or 50% epiboly stage. The

687 temperature was kept constant at 28°C throughout the imaging experiment using a temperature  
688 control system. Whole embryo *in vivo* microscopic imaging was performed in a Leica TCS LSI  
689 Confocal microscope with HCS software using a 5x objective and 488/520 ( $\lambda_{exc}/\lambda_{em}$ ) lasers.

### 690 **High-resolution confocal imaging**

691 Tg(*sox17::GFP*) and Tg(*sox17::utrn-GFP*) embryos were used for high-resolution confocal imaging  
692 of cell protrusions. Tg(*actb1::myl12.1-eGFP*) and *lifeactin-RFP* injected embryos were used to  
693 analyze myosin II and F-actin *in vivo*. Embryos were imaged from shield stage onwards in a Volocity  
694 ViewVox® spinning disc (Perkin Elmer®) coupled to a Zeiss Axiovert 200 confocal microscope using  
695 a Plan-Apochromat 40x/1.2W lasers 488/520, 568/600 and 647/697 nm ( $\lambda_{exc}/\lambda_{em}$ ). Processing and  
696 analysis of digital images were performed using Fiji (Schindelin, Arganda-Carreras et al. 2012),  
697 Matlab (Matlab 2014), Volocity (Improvision®) and Adobe photoshop.

### 698 **Laser ablation**

699 Mechanical disruption of the actomyosin ring within the YSL was performed as previously described  
700 by conducting laser ablation on a UV laser ablation setup (Behrndt, et al., 2012) equipped with a  
701 Zeiss 63x 1.2 NA water immersion lens using Tg(*actb1::myl12.1-eGFP*) embryos. Embryos were  
702 mounted at 50% epiboly (5.3 hpf) and the YSL actomyosin cortex close to the EVL margin was  
703 repeatedly ablated by applying 10 UV pulses at 1,000 Hz on a rectangular ROI. Suboptimal ablation  
704 intensity was applied to just disrupt the cortical actomyosin flux and marginal ring, and avoid the  
705 activation of a wound response within the yolk cell. The kinetic of EVL cells, DFCs and YSL marginal  
706 actomyosin network adjacent to the disrupted cortex was compared with the kinetic of close  
707 neighbouring tissues showing intact regions of the actomyosin network as an internal control.  
708 Cortical laser ablation of the EVL was performed parallel to the EVL margin and perpendicular to the  
709 EVL actomyosin cortex by applying 25 ultraviolet pulses at 1,000 Hz along a 10 $\mu$ m-line. Retraction  
710 of apical ties and DFCs were quantified from maximum z-projections images.

### 711 **Actomyosin dynamics analysis**

712 Images obtained from *in vivo* imaging of Tg(*actb1::myl12.1-eGFP*) embryos were segmented  
713 manually as described below in the method section to obtain the apical ROI of DFCs. A maximum  
714 z-projection of 5  $\mu$ m of depth using Fiji was applied to each xyz stack to obtain a 2D sequence.  
715 Florescence intensity was calculated in Fiji as the average intensity per pixel in each apical ROI  
716 during the entire process of apical constriction underlying DFC delamination.

### 717 **Cell protrusion analysis**

718 Quantification of cell protrusions was assessed by making volumetric binary masks from 4D confocal  
719 images using manual threshold to keep the presence of protrusions and avoid artefacts. Each  
720 volume was reduced to a 2D cluster mask by z-projection based on maximum intensity. Manual  
721 correction allowed to keep protrusion zones that were occluded due to dimensional reduction. The  
722 Fiji tool Local Thickness was used to generate a central mask to describe the cluster central zone  
723 without the protrusions. Masks containing just the protrusions zones were obtained by subtracting  
724 cluster masks and central masks. Each protrusion was defined with a protrusion axis that connected  
725 the base and tip of the protrusion. A long axis connected the cluster centroid and the base of each  
726 protrusion. Individual protrusion orientation was described calculating the angle between the long  
727 axis and the protrusion axis.

### 728 **Cell segmentation**

729 Images obtained from *in vivo* imaging of *gap43-RFP* or *ZO1-GFP* mRNA injected embryos were  
730 segmented manually using Wacom Cintiq Touch Screen tablet (Wacom) and Fiji software  
731 ([Schindelin, et al., 2012](#)). A maximum z-projection using Fiji was first applied to each xyz stack to  
732 obtain a 2D sequence and simplify the xy segmentation of cell boundaries. To perform segmentation  
733 in the yz plane, z-projections containing the central region of cell volume of marginal and submarginal  
734 DFCs were selected and reconstructed using Fiji.

### 735 **Cell tracking**

736 Cell movement was tracked by following the cell's center in *Tg(sox17::GFP)* embryos, and the  
737 nucleus in *H2B* mRNA injected embryos. YSL tracking was performed by following arbitrary  
738 landmarks inside the marginal actomyosin network. Tracking of apical attachments was assessed  
739 by following actin rich zones localised in the apical face of DFCs. Tracking was performed manually  
740 in 2D from maximum z-projections using Fiji plugin MTrack J. Speed and persistence (ratio of  
741 displacement to trajectory length) of movement was then calculated from tracking data.

### 742 **Statistical analysis**

743 All experiments were performed at least three times. Unless indicated, plots display the mean and  
744 the standard deviation. Statistical inference analysis was conducted initially by a *Shapiro-Wilk* test  
745 to assess if the data were normally distributed. Two-sample *F*-test of equality of variance was applied  
746 to assess if the samples had the same variance. Significance for two groups with normal distribution  
747 was calculated through a two-tail *t*-test and the *p*-value was selected depending if the dataset had  
748 or not equality of variance. For other distributions, a non-parametric *Kolmogorov-Smirnov* test was  
749 applied. A one-way ANOVA test was conducted to compare more than two groups. If the ANOVA  
750 test indicated significant differences between the means a *Bonferroni* test was conducted to

751 calculate the level of significance between the samples. All statistical analyses were conducted using  
 752 the Origin 2016 (OriginLab).

753

754

755 **Key Resource Table**

| REAGENT or RESOURCE                                                        | SOURCE                                    | IDENTIFIER                   |
|----------------------------------------------------------------------------|-------------------------------------------|------------------------------|
| Antibodies                                                                 |                                           |                              |
| Mouse anti-ZO-1                                                            | Thermo Fisher Scientific                  | Cat# 339100 RRID:AB_2533147  |
| Rabbit Phospho-Myosin Light Chain 2 (Ser19)                                | Cell Signaling                            | Cat# 3671 RRID:AB_330248     |
| Anti-Cdh1                                                                  | <a href="#">Maître, et al., 2012</a>      | MPI-CBG (#174)               |
| Goat anti-mouse Alexa Fluor 488                                            | Thermo Fisher Scientific                  | Cat# A-11001 RRID:AB_2534069 |
| Goat anti-rabbit Alexa Fluor 568                                           | Thermo Fisher Scientific                  | Cat# A-11011 RRID:AB_143157  |
| Critical Commercial Assays                                                 |                                           |                              |
| mMESSAGE mMACHINE™ SP6 Transcription Kit                                   | Thermo Fisher Scientific                  | Cat# AM1340                  |
| Experimental Models: Organisms/Strains                                     |                                           |                              |
| Zebrafish: AB wild type                                                    | ICBM-University of Chile                  | N/A                          |
| Zebrafish: Tg( <i>actb1::myl12.1-eGFP</i> )                                | <a href="#">Behrndt, et al., 2012</a>     | N/A                          |
| Zebrafish: Tg( <i>sox17::utrn-GFP</i> )                                    | <a href="#">Woo, et al., 2012</a>         | N/A                          |
| Zebrafish: Tg( <i>sox17::GFP</i> )                                         | <a href="#">Sakaguchi, et al., 2006</a>   | N/A                          |
| Zebrafish: Tg( <i>actb1::mCherry-utrCH</i> )                               | <a href="#">Behrndt, et al., 2012</a>     | N/A                          |
| Zebrafish: Tg( <i>actb1::myl12.1-eGFP</i> ).                               | <a href="#">Behrndt, et al., 2012</a>     | N/A                          |
| Zebrafish: Tg( <i>actb1::myl12.1-eGFP</i> ; <i>actb1::mCherry-utrCH</i> ). | This study                                | N/A                          |
| Oligonucleotides                                                           |                                           |                              |
| Morpholino: Cadherin-1 (cdh1 MO)<br>TAAATCGCAGCTCTTCCTCCAACG               | Gene Tools                                | N/A                          |
| Recombinant DNA                                                            |                                           |                              |
| pCS2- <i>Gap43-RFP</i>                                                     | <a href="#">Reig, et al. 2017</a>         | N/A                          |
| pCS2- <i>lifeACT-RFP</i>                                                   | <a href="#">Behrndt, et al., 2012</a>     | N/A                          |
| pCS2- <i>GFP-zo1-1b</i>                                                    | <a href="#">Schwayer, et al., 2019</a>    | N/A                          |
| <i>N-ter(1-300aa)-Mypt1</i>                                                | <a href="#">Jayashankar, et al., 2013</a> | N/A                          |
| pCS2-h2b-GFP                                                               | <a href="#">Keller, et al., 2008</a>      | N/A                          |

| Software and Algorithms |                                          |                                                                                                           |
|-------------------------|------------------------------------------|-----------------------------------------------------------------------------------------------------------|
| Fiji                    | Schindelin, Arganda-Carreras et al. 2012 | <a href="https://imagej.net/Fiji">https://imagej.net/Fiji</a>                                             |
| MATLAB                  | MATLAB Software                          | <a href="https://la.mathworks.com/products/matlab.html">https://la.mathworks.com/products/matlab.html</a> |
| Volocity                | Quorum Technologies Inc                  | <a href="https://quorumtechnologies.com/">https://quorumtechnologies.com/</a>                             |
| Origin                  | OriginLab                                | <a href="https://www.originlab.com/">https://www.originlab.com/</a>                                       |

756



1 Supplemental Information

2 **Apical contacts stemming from incomplete delamination**  
3 **guide progenitor cell allocation through a dragging**  
4 **mechanism**

5 Eduardo Pulgar, Cornelia Schwayer, Néstor Guerrero, Loreto López, Susana Márquez,  
6 Steffen Härtel, Rodrigo Soto, Carl-Philipp Heisenberg, and Miguel L. Concha

7

8 Supplemental Figures (pages 1-8)

9 Legends of Supplementary Videos (pages 9-11)

10

11

12

13

14

15

16

17

18

19

20

21 Supplemental Figures

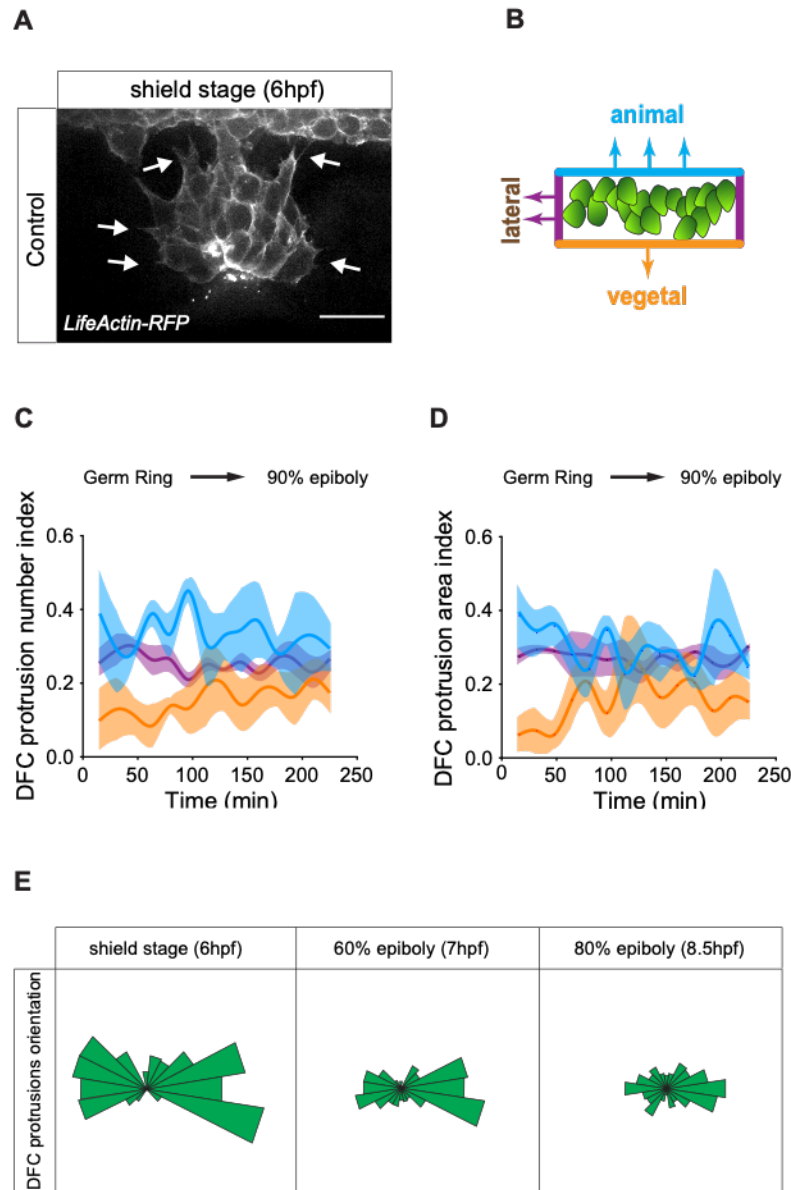

22

23

24 **Supplementary Figure 1. DFC protrusions are not polarised in direction of the vegetal**  
25 **movement of the cluster.** (A) Dorsal views of DFCs from a living *lifeactin-RFP* injected embryo  
26 at shield stage, with animal to the top. White arrows indicate lamellar- and filopodial-like cell  
27 protrusions. Scale bar 50  $\mu$ m. (B) Scheme of the DFC cluster showing how cell protrusions  
28 extending from the vegetal (orange), lateral (purple) and animal (light blue) edges of the cluster

29 were quantified in Tg(*actb1:lifeactin-RFP*) embryos to build the plots of C and D. (C) Kinetic of  
30 DFC protrusion number index (n=3 embryos).

31 (D) Kinetic of DFC protrusion area index (n=3 embryos). (E) Circular distribution plots of DFC  
32 protrusions at different developmental stages obtained from fixed Tg(*sox17:utrn-GFP*) embryos  
33 (n=10 per developmental stage).

34

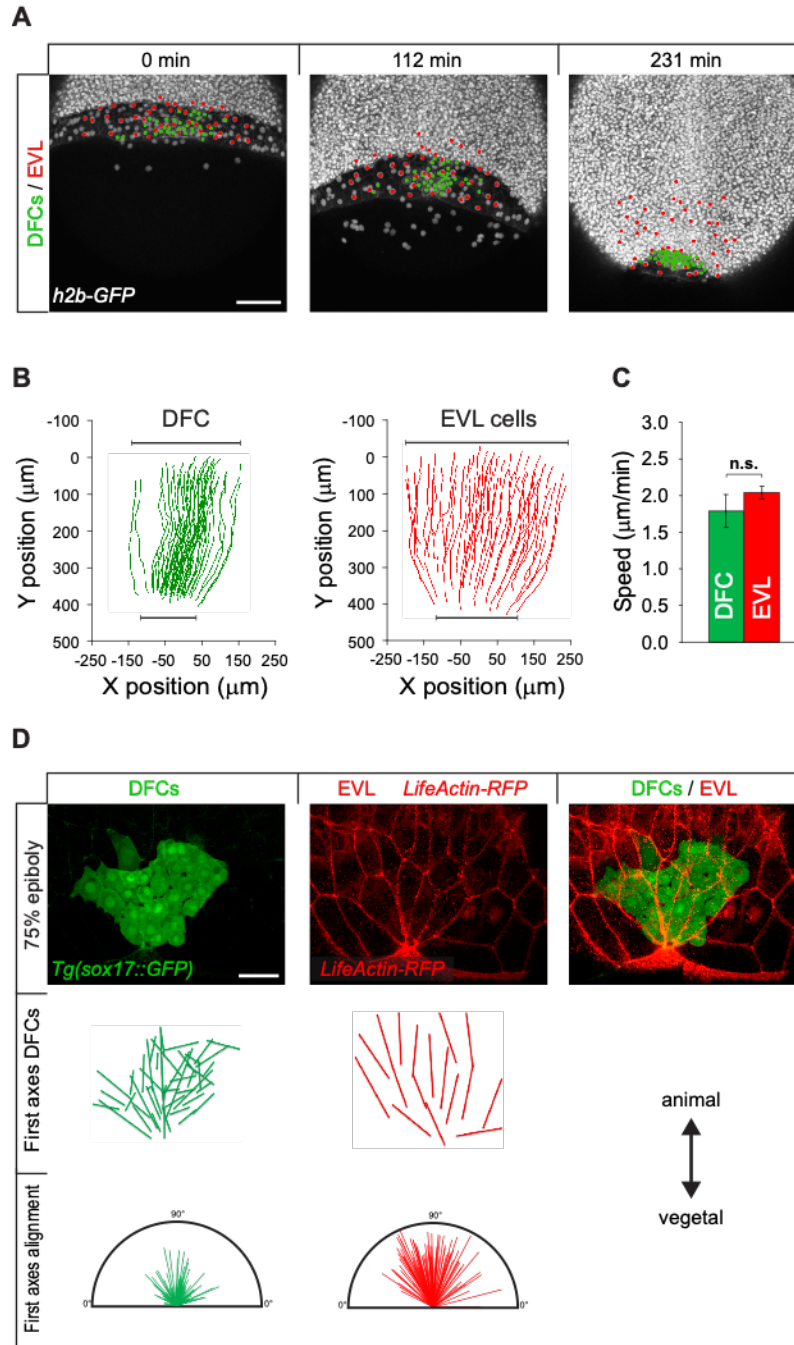

35  
36

37 **Supplementary Figure 2. The movement of DFCs mirrors the pattern of EVL vegetal**  
 38 **spreading.** (A) Dorsal views of confocal z-stack maximum projections of a wild type embryo  
 39 injected with h2b-GFP mRNA to label all nuclei (white dots in left and middle panels), and the  
 40 corresponding positions of nuclei showing the concordant movement of DFCs (green dots) and  
 41 overlying dorsal EVL cells (red dots). Dorsal view with animal to the top, from shield stage (6 hpf).  
 42 Scale bar, 100  $\mu$ m. (B) Cell tracking of the vegetal movement and convergence between shield

43 and 90% of epiboly of DFCs (green) and overlying EVL (red) in a representative wild type embryo  
44 injected with *h2b-GFP* mRNA.

45 (C) Speed of DFCs (green) and EVL (red), expressed as means  $\pm$  SD (n = 3 embryos). n.s. (non  
46 significant). (D) Dorsal views of DFCs, EVL cells and merge from a representative living  
47 Tg(*sox17:GF*) injected with *lifeactin-RFP* embryo at 75% of epiboly (top). Spatial representation  
48 of the alignment of the first principal axis of DFCs and EVL cells (middle). Distribution plot of the  
49 alignment of first principal axis of DFCs and EVL cells from 3 embryos (bottom). Animal is to the  
50 top in all panels. Scale bar, 50  $\mu$ m.

51

52

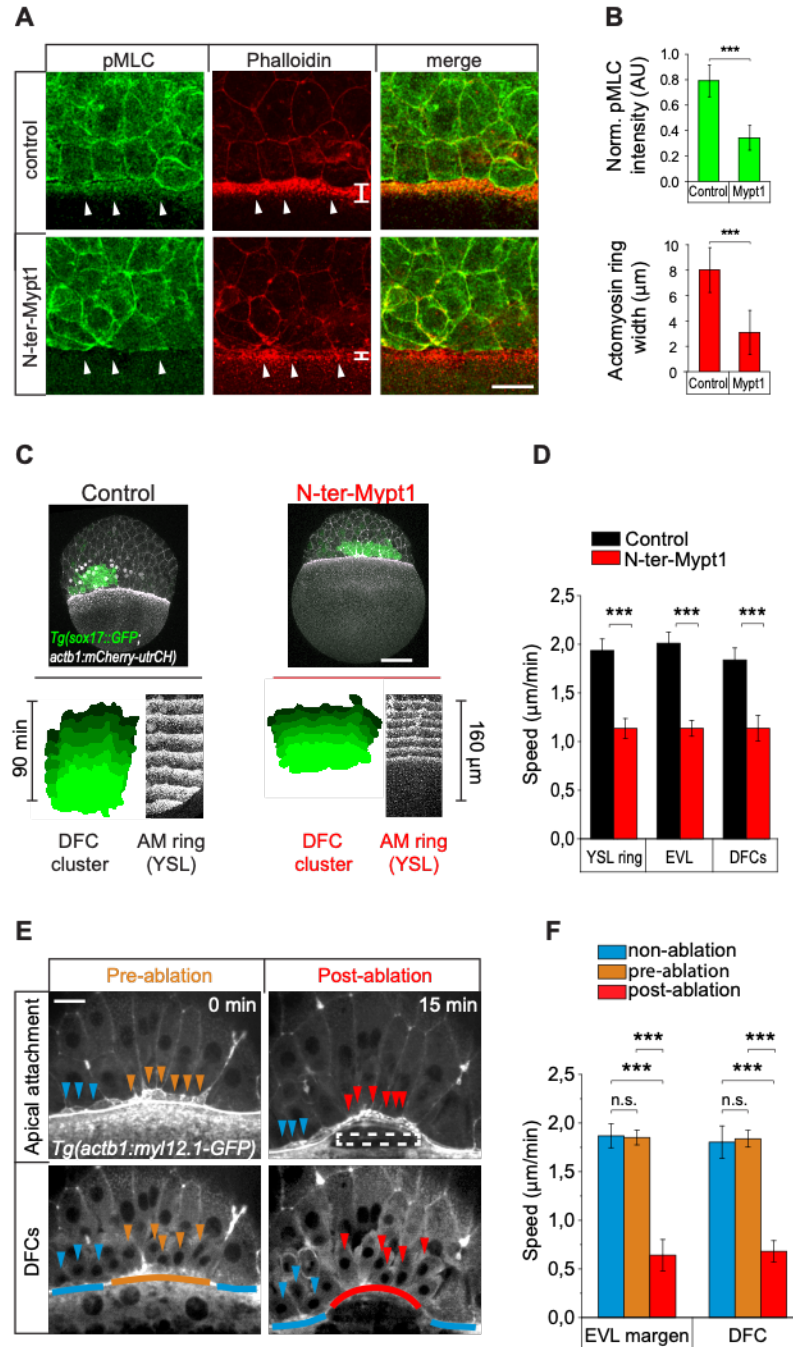

53  
54  
55  
56  
57  
58  
59  
60

**Supplementary Figure 3. Disruption of the YSL actomyosin network impairs DFC vegetal movement.** (A and B) The YSL actomyosin ring is disrupted in embryos over expressing N-ter-Mypt1 in the yolk cell. (A) Immunostaining of phospho-myosin light chain II (left), phalloidin (middle) and merge (right) at 75% of epiboly in controls (top) and embryos injected with N-ter-Mypt1 specifically in the yolk cell (bottom). White arrows indicate the actomyosin ring in the YSL

61 that is affected in the injected embryos. Animal is to the top. Scale bar, 20  $\mu$ m. (B) Quantification  
62 of phospho-myosin light chain II fluorescence intensity (top) and actomyosin ring width (bottom)  
63 in control and N-ter-Mypt1 injected embryos. Values correspond to means  $\pm$  S.D. (n=3 embryos).  
64 \*\*\* ( $p < 0.001$ ). (C and D) DFC movements are affected after disruption of the YSL actomyosin  
65 ring. (C) Dorsal views of confocal z-stack maximum projections of Tg(*sox17::GFP*;  
66 *actb1::mCherry-utrCH*) embryos at 60% epiboly (7 hpf). Top images correspond to control (left)  
67 and experimental embryo injected with 5 pg of *N-ter-Mypt1* mRNA into the yolk cell at 3.3 hpf  
68 (right). Bottom kymographs show the movement of DFCs (green) and the YSL actomyosin ring  
69 (white) between 60% and 80% epiboly (7-8 hpf) in control (left) and N-ter-Mypt1 (right) conditions.  
70 Animal is to the top in all panels. Scale bar, 100  $\mu$ m. (D) Quantification of the vegetal speed of  
71 DFCs, EVL and the YSL actomyosin ring from 60% to 80% epiboly in control (black) and N-ter-  
72 Mypt1 (red) conditions. Values correspond to means  $\pm$  S.D. (n=3 embryos). \*\*\* ( $p < 0.001$ ). (E  
73 and F) Laser disruption of the the YSL actomyosin network impairs DFC vegetal movements. (E)  
74 Dorsal views of a Tg(*actb1::myl12.1-GFP*) embryo at early shield stage (5.8 hpf) before and after  
75 laser ablation of the cortical actomyosin ring of the YSL. Confocal optical planes are at the level  
76 of the EVL showing the apical contacts (top) and DFCs (bottom). The dashed rectangle depicts  
77 the zone of laser ablation, arrowheads point to apical contacts (top) and individual DFCs (bottom),  
78 while lines depict the position of the EVL margin immediately above the ablation zone (orange  
79 and red) and lateral to this region (blue). Animal is to the top. Scale bar, 20  $\mu$ m. (F) Quantification  
80 of the vegetal speed of DFCs and the EVL margin in control un-ablated (blue) and ablated zones,  
81 prior (orange) and after (red) the ablation. Values correspond to means  $\pm$  S.D. (n=3 embryos). \*\*\*  
82 ( $p < 0.001$ ). n.s. (non-significant).

83

84

85

86

A

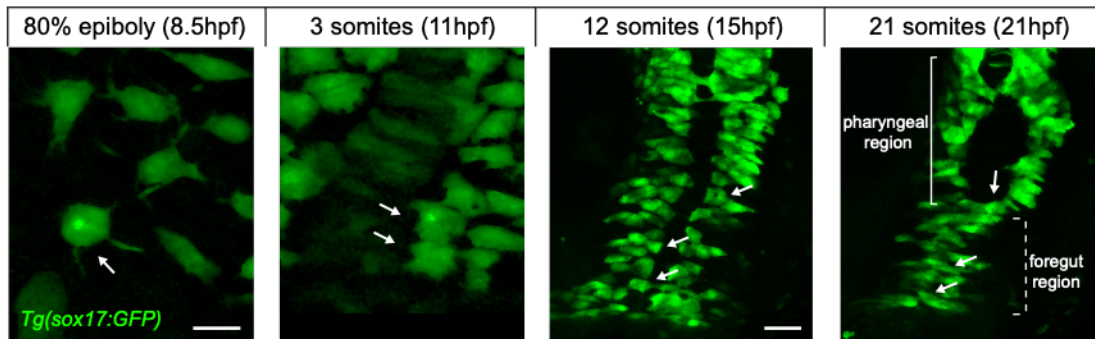

B

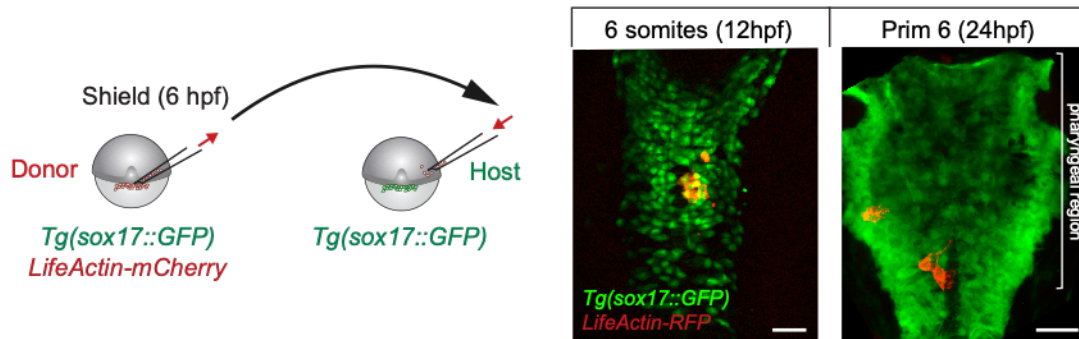

87

88

89 **Supplementary Figure 4. DFCs have endodermal potential and acquire endodermal fate**

90 **after internalising into the DCL.** (A) During normal development, delaminated DFCs can leave  
91 the main cluster and internalise into the DCL (see Fig 5A,B). Once in the DCL, these cells mimic  
92 the morphology and migratory behaviour of endodermal cells during gastrulation (80% epiboly)  
93 and neurulation (3-somites) and later integrate into endodermal tissue derivatives (12- and 21-  
94 somites). An example of the behaviour and fate of a escape DFC is indicated with arrows. Scale  
95 bar, 20  $\mu$ m. (B) Isochronic DFC transplantation. DFCs from donor *Tg(sox17::GFP)* embryos  
96 injected with *lifeactin-RFP* mRNA were transplanted into the paraxial region of host  
97 *Tg(sox17::GFP)* embryos (left). Transplanted DFCs (in red) integrated into endodermal tissue  
98 derivatives (in green) (right). Scale bar, 20  $\mu$ m.

99



100 Legends of Supplementary Videos

101

102 **Supplementary Video 1. Movement of DFCs from the embryo equator to the vegetal pole**  
103 **during epiboly** (related to [Figure 1A](#)). Time-lapse video of confocal z-stack maximum projections  
104 of a Tg(*sox17:GFP*) embryo injected with *gap43-RFP* mRNA, showing cytoplasmic GFP (green)  
105 in DFCs from early stages (main cell cluster) and later in the forming endoderm (scattered cells),  
106 and membrane-tagged RFP (red) in all cells. Dorsal view with animal to the top. The video starts  
107 at 50% epiboly (5.3 hpf). Images were acquired every 8 minutes. Scale bar, 100  $\mu$ m.

108

109 **Supplementary Video 2. Delamination, apical constriction and vegetal movement of DFCs**  
110 **during epiboly** (related to [Figures 1E and 1F](#)). Time-lapse video of confocal z-stack maximum  
111 projections of an embryo injected with *zo1-GFP* and *gap43-RFP*, showing dorsal views at the  
112 level of the EVL (left, *zo1-GFP* channel) and under the EVL (middle, *gap43-RFP* channel), and  
113 the merge image on the right. The surface view shows *zo1-GFP* enriched at the apical junctions  
114 of DFCs as they undergo apical constriction. *zo1-GFP* also labels the junctions of dorsal EVL  
115 cells with less intensity. DFCs are labelled at time=0 with orange dots. Dorsal EVL cells are  
116 labelled at time=0 with blue dots. The middle row is focused under the apical face of EVL and  
117 shows *gap43-RFP* membrane staining in delaminating DFCs (orange labelling at time=0), some  
118 marginal EVL cells (blue labelling at time=0) and the deep cells of the blastoderm margin  
119 (unlabelled at time=0). The bracket indicates the group of ingressing DFCs. The video starts at  
120 50% epiboly (5.3 hpf). Images were acquired every 1.7 minutes. Scale bar, 20 $\mu$ m

121

122 **Supplementary Video 3. Dynamics of apical constriction of DFCs during spontaneous**  
123 **apical myosin loss and recovery** (related to [Figures 2G and 2H](#)). Time-lapse video of confocal  
124 microscopy z-stack maximum projections of a Tg(*actb1:myl12.1-GFP*) embryo revealing that  
125 apical constriction and relaxation correlates with apical myosin accumulation and loss,  
126 respectively. Red arrow indicates the time of maximum apical area relaxation and minimum apical  
127 myosin accumulation. Scale bar, 10  $\mu$ m.

128 **Supplementary Video 4. Apical attachments of DFCs are under pulling tension from extra-**  
129 **embryonic tissues** (related to [Figures 4A-4C](#)). Time-lapse video of confocal microscopy z-  
130 sections of a Tg(*actb1:myl12.1-GFP*) embryo at 70% of epiboly, focused at the level of the EVL  
131 (left panel) and DFCs (right panel), showing the animal-ward recoiling of apical attachments of  
132 two DFCs after the laser line ablation of an EVL cortical junction (red line). Dorsal view with animal

133 to the top. Time 0 corresponds to laser ablation, with negative and positive times indicating pre-  
134 and post-laser ablation times, respectively. Scale bar, 20  $\mu\text{m}$ .

135

136 **Supplementary Video 5. Apical attachments promote a persistent vegetal movement of**  
137 **attached DFCs** (related to [Figures 4D-4E](#)). Time-lapse video of confocal microscopy z-stack  
138 maximum projections of a Tg(*sox17::GFP; actb1::mCherry-utrCH*) embryo expressing cytoplasmic  
139 GFP (green) in DFCs and F-actin (white) in all cells. Tracks of isolated DFCs (left panel) reveal  
140 that attached DFCs show persistent vegetal movements (light blue cell, and yellow cell before the  
141 loss of apical attachment at 50 min). In contrast, detached DFCs devoid of apical attachments  
142 (detached DFCs) move with little persistence and lack directionality (red cell, and yellow cell after  
143 the loss of apical attachment at 50 min). Dorsal view with animal to the top. The video starts at  
144 60% epiboly (7 hpf). Scale bar, 50 $\mu\text{m}$ .

145

146 **Supplementary Video 6. DFCs can leave the main cluster and internalise into the DCL**  
147 (related to [Figures 5A and 5B](#)). Time-lapse video of confocal microscopy z-stack maximum  
148 projections of a Tg(*sox17::GFP*) embryo (left and middle panels), and the corresponding merge  
149 image with bright field (right panel), showing the escape and internalisation into the DCL of two  
150 DFCs (light blue tracks). Dorsal view with animal to the top. The video starts at the germ ring  
151 stage (5.7 hpf). Images were acquired every 3 minutes. Scale bar, 50  $\mu\text{m}$ .

152

153 **Supplementary Video 7. Long polarised protrusions promote the initiation of adhesive**  
154 **contacts between DFCs**. Time-lapse video of confocal microscopy z-stack maximum projections  
155 of a Tg(*sox17::GFP*) embryo, with an inverted lookup table, showing DFCs at the edge of the  
156 cluster producing long polarised lamellar- and filopodial-like cell protrusions (arrows) that contact  
157 distant DFCs and bring them closer to the cluster. Dorsal view with animal to the top. The video  
158 starts at 60% epiboly (7 hpf). Scale bar, 20  $\mu\text{m}$ .

159

160 **Supplementary Video 8. Polarised protrusions promote the establishment of adhesive**  
161 **contacts and cluster formation before laterality organ progenitors loose their apical**  
162 **attachments**. Time-lapse movie of confocal microscopy z-stack maximum projections of a  
163 Tg(*sox17::utm-GFP*) embryo, showing a small cluster of DFCs in the vicinity of the main DFC  
164 cluster. DFCs at the edge of both clusters send long polarised lamellar- and filopodial-like cell  
165 protrusions (arrows) and establish adhesive contacts. DFCs from the small cluster then fuse

166 within the main cluster before losing their apical ties (arrowheads). Dorsal view with animal to  
167 the top. The video starts at 70% epiboly. Scale bar, 20  $\mu\text{m}$ .
